1  
2  
3  
4  
5  
6  
7  
8  
9  
10  
11  
12  
13  
14  
15  
16  
17  
18  
19  
20  
21  
22  
23  
24  
25  
26  
27  
28

**The expression of equine keratins K42 and K124 is restricted to the hoof  
epidermal lamellae of *Equus caballus***

Caitlin Armstrong<sup>1</sup>, Lynne Cassimeris<sup>2</sup>, Claire Da Silva Santos<sup>2</sup>, Yagmur Micoogullari<sup>2,#</sup>,  
Bettina Wagner<sup>3</sup>, Susanna Babasyan<sup>3</sup>, Samantha Brooks<sup>4</sup>, Hannah Galantino-Homer<sup>1,\*</sup>

<sup>1</sup>Department of Clinical Studies, New Bolton Center, University of Pennsylvania, School of  
Veterinary Medicine, Kennett Square, Pennsylvania, United States of America

<sup>2</sup>Department. of Biological Sciences, Lehigh University, Bethlehem, Pennsylvania, United States  
of America

<sup>3</sup>Department of Population Medicine and Diagnostic Sciences, College of Veterinary Medicine,  
Cornell University, Ithaca, New York, United States of America

<sup>4</sup>Department of Animal Sciences and University of Florida Genetics institute, University of  
Florida, Gainesville, Florida, United States of America

#Present address: Department of Pathology, Brigham and Women's Hospital and Harvard  
Medical School, Boston, Massachusetts, United States of America

\*Corresponding author

E-mail: [hghomer@vet.upenn.edu](mailto:hghomer@vet.upenn.edu) (HGH)

29 **Abstract**

30 The equine hoof inner epithelium is folded into primary and secondary epidermal lamellae which  
31 increase the dermo-epidermal junction surface area of the hoof and can be affected by laminitis,  
32 a common disease of equids. Two keratin proteins (K), K42 and K124, are the most abundant  
33 keratins in the hoof lamellar tissue of *Equus caballus*. We hypothesize that these keratins are  
34 lamellar tissue-specific and could serve as differentiation- and disease-specific markers. Our  
35 objective was to characterize the expression of K42 and K124 in equine stratified epithelia and to  
36 generate monoclonal antibodies against K42 and K124. By RT-PCR analysis, keratin gene (*KRT*)  
37 *KRT42* and *KRT124* expression was present in lamellar tissue, but not cornea, haired skin, or  
38 hoof coronet. In situ hybridization studies showed that *KRT124* localized to the suprabasal and,  
39 to a lesser extent, basal cells of the lamellae, was absent from haired skin and hoof coronet, and  
40 abruptly transitions from *KRT124*-negative coronet to *KRT124*-positive proximal lamellae. A  
41 monoclonal antibody generated against full-length recombinant equine K42 detected a lamellar  
42 keratin of the appropriate size, but also cross-reacted with other epidermal keratins. Three  
43 monoclonal antibodies generated against N- and C-terminal K124 peptides detected a band of the  
44 appropriate size in lamellar tissue and did not cross-react with proteins from haired skin, corneal  
45 limbus, hoof coronet, tongue, glabrous skin, oral mucosa, or chestnut on immunoblots. K124  
46 localized to lamellar cells by indirect immunofluorescence. This is the first study to demonstrate  
47 the localization and expression of a hoof lamellar-specific keratin, K124, and to validate anti-  
48 K124 monoclonal antibodies.

49        **1. Introduction**

50        The skin and its appendages are made of stratified epithelia composed of keratinocytes,  
51 defined by expression of keratin intermediate filament proteins (abbreviated K for proteins and  
52 *KRT* for genes) [1]. Keratin filaments resist stretching (strain) and provide tensile strength to  
53 epithelia and skin appendages. Tissue- and differentiation-specific variation in specific keratin  
54 isoform content determines the physical and mechanical properties of diverse epithelial tissues  
55 and of their keratinocyte building blocks [2;3]. Understanding how keratins function to provide  
56 mechanical stability is crucial to our understanding of human diseases associated with keratin  
57 mutations and abnormal keratin expression [4-8]. Here we describe unique keratins of the equine  
58 (*Equus caballus*) epidermal lamellae, a highly specialized tissue that withstands extreme force  
59 and provides a model for understanding how keratins provide mechanical strength to flexible  
60 tissues.

61        Each single-toed foot of a 500 kg horse (*E. caballus*) must withstand peak ground reaction  
62 forces of 2-5,000 N while protecting the underlying limb from trauma [9;10]. The equine  
63 adaptation to single-toed unguligrade locomotion requires the integration of the musculoskeletal  
64 system with a cornified hoof capsule and the strong, but flexible, suspension of the distal phalanx  
65 from the inner surface of the hoof capsule [11-13]. As shown in Fig 1, the inner epithelium of the  
66 equine hoof capsule, which is homologous to the nail bed [14], is folded into primary and  
67 secondary epidermal lamellae (PELs and SELs, respectively), thus increasing the surface area of  
68 epidermal-dermal attachment and, with the dermal connective tissue to which it adheres, forming  
69 the suspensory apparatus of the distal phalanx (SADP) [12]. Structural failure of the SADP  
70 results in laminitis, a common and crippling disease of equids and other ungulates [15]. In spite

71 of the importance of the hoof lamellae for equine locomotion and disease, few aspects of hoof  
72 lamellar biology, including keratin isoform composition, have been well characterized.

73

74 **Fig 1: Macroscopic anatomy of the equine (*E. caballus*) foot and microscopic anatomy of**

75 **the hoof lamellae.** (A) Equine foot, midsagittal section, showing locations of samples retrieved

76 for this study: HS: haired skin and the following hoof capsule regions: C: coronet (proximal

77 stratum medium layer and nail matrix homolog), P: periople (stratum externum layer and cuticle

78 homolog), HW: hoof wall (stratum medium layer and nail plate homolog), L: lamellar tissue,

79 including epidermal lamellae (stratum internum layer and nail bed homolog), dermal lamellae,

80 and dermal corium up to the surface of the distal phalanx (DP). (B) Transverse section of the

81 lamellar region (H&E stain). HW, at the top of the image, is contiguous with the approximately

82 500 cornifying primary epidermal lamellae (PELs) of each hoof capsule. Each PEL has 100-150

83 secondary epidermal lamellae (SELs; black arrowhead). The PELs and SELs interdigitate with

84 primary dermal lamellae (PDLs) and secondary dermal lamellae (SDLs) which are in turn

85 continuous with the dermal corium (D), transferring the weight of the horse from the DP to the

86 HW. Scale bars: A: 1 cm; B: 500  $\mu$ m

87

88 Equine keratin isoform expression and localization has relied entirely on commercial

89 antibodies, many of which cross-react with multiple keratin isoforms [16;17]. Similar to other

90 stratified epithelia, hoof lamellae express K14 in the basal cell layer, and also express unique

91 keratin isoforms that contribute to the health and disease of this tissue [18;19]. By proteomics,

92 we discovered two novel equine keratins, K42 and K124.[18] These keratins are the most

93 abundant cytoskeletal proteins in equine hoof lamellae, accounting for over fifty percent of the  
94 total keratin content of this tissue [18].

95 *KRT42* and *KRT124* exist only as pseudogenes in humans, *KRT42P* and *KRT90P*,  
96 respectively (the latter was formerly named *KRT124P* when equine *KRT124* was named  
97 [1;18;20]). Murine *Krt42* (formerly *K17n* or *Ka22*) mRNA is expressed in the nail unit [21]. A  
98 putative *KRT124* ortholog, *Krt90* (formerly *Kb15*), is translated from cDNA libraries in mice  
99 and rats [22] and was identified from the draft genomic sequence of the opossum [23]. *KRT42*  
100 and *KRT124* were recently identified and mapped to the canine and equine genomes, but their  
101 patterns of expression have not been described beyond their identification from RNA-seq data  
102 derived from skin biopsies from three dogs and one horse [20]. The lack of isoform-specific  
103 antibodies has impeded the detailed investigation of equine hoof capsule or lamellar tissue-  
104 specific keratins [19]. The objectives of this study were to characterize the pattern of expression  
105 of K42 and K124 in equine stratified epithelia of the hoof and skin and to determine if the most  
106 abundant keratins of the hoof lamellae are specific differentiation markers of this highly  
107 specialized epithelium. We report here that K42 and K124 expression is restricted to equine hoof  
108 lamellae and we have characterized monoclonal antibodies against K124.

109

## 110 **2. Methods**

### 111 **2.1 Ethics statement**

112 The protocols, titled ‘Pathophysiology of Equine Laminitis (By-products only)’ and ‘Equine  
113 Laminitis Tissue Bank,’ under which the archived equine tissue samples used for this study were  
114 collected, were approved by the University of Pennsylvania Institutional Animal Care and Use  
115 Committee (protocol #801950 and #804262, respectively). Euthanasia of the horses was carried

116 out in accordance with the recommendations in the Guide for the Care and Use of Agricultural  
117 Animals in Research in Teaching Federation for Animal Science Societies) and the AVMA  
118 Guidelines for the Euthanasia of Animals (American Veterinary Medical Association) by  
119 overdose with pentobarbital sodium and phenytoin sodium. Mouse immunization, euthanasia by  
120 cervical dislocation, and monoclonal antibody production were carried out in accordance with  
121 the recommendation in the Guide for the Care and Use of Laboratory Animals of the National  
122 Institute of Health. The protocol titled ‘Mouse Monoclonal Antibody Production’ was approved  
123 by the Institutional Animal Care and Use Committee at Cornell University (protocol #2007-  
124 0079).

125

## 126 **2.2 Subjects and tissue retrieval**

127 All *E. caballus* subjects are part of a laminitis tissue repository, were euthanized for medical  
128 reasons unrelated to this study, as previously described [24], and had no clinical history,  
129 macroscopic or microscopic evidence of hoof, dermatological, or corneal diseases in the tissues  
130 used [25]. Age, breed, sex, and tissues used from each subject are listed in S1 Table. Anatomical  
131 locations of tissues dissected from the foot are illustrated in Fig 1A. Haired skin, coronet  
132 (coronary region of the hoof, homologous to the nail matrix [14], including epidermal and  
133 supporting dermal tissue at the proximal edge of the hoof capsule, from which the hoof wall (nail  
134 plate) grows), and lamellar tissues (the innermost layer of the hoof capsule, homologous to the  
135 nail bed [14], including PELs and SELs, corresponding primary and secondary dermal lamellae  
136 and adjacent dermal corium) were collected immediately after euthanasia, as described elsewhere  
137 [24;26;27]. All other tissues were dissected by scalpel immediately post mortem. Tissue samples  
138 were immediately either 1) snap frozen in liquid nitrogen and stored in liquid nitrogen until

139 processed for protein or RNA extraction, 2) formalin-fixed/paraffin-embedded (FFPE) until  
140 sectioned for in situ hybridization studies, or 3) paraformaldehyde-fixed/sucrose-dehydrated,  
141 embedded, frozen, and stored at -80°C until sectioned for indirect immunofluorescence, as  
142 previously described [18;28].

### 143 **2.3 Oligonucleotide primers, RNA extraction, and qualitative PCR**

144 Oligonucleotide primers for equine keratin isoforms *KRT10A*, *KRT10B*, *KRT14*, *KRT42*,  
145 and *KRT124* were designed using Primer3 (<http://bioinfo.ut.ee/primer3-0.4.0/>)[29] and are listed  
146 in Table 1. All oligonucleotides were synthesized by Integrated DNA Technologies, Inc.  
147 (Coralville, IA, USA). Alternate forward primers were designed to amplify the two *KRT10*  
148 genes, *KRT10A* and *KRT10B*, since the equine *KRT10* gene has undergone duplication [20]. For  
149 *KRT124*, one set of primers was designed to amplify the 3' exon (*KRT124 3'*), which shows no  
150 homology to known keratins, and a second primer set was designed to amplify a region of the  
151 predicted transcript that shows some homology to several keratins (*KRT124 Mid*). For all  
152 primers, RT-PCR product sequence was confirmed by Sanger sequencing for at least one band  
153 from each positive tissue type (data not shown).

154 **Table 1: PCR Primer sequences**

| Primer name <sup>†</sup> | Sequence (5'-3')            | Genome target (EquCab 2.0)  | mRNA length (bp) | Genomic length (bp) | Gene ID <sup>‡</sup> |
|--------------------------|-----------------------------|-----------------------------|------------------|---------------------|----------------------|
| <i>KRT10A</i> F          | AAGGCTCCCTTGGTG<br>GAGGT    | chr11:21819187<br>-21820546 | 555              | 1363                | 100146924            |
| <i>KRT10A</i> R          | GCACCACATTGGCAT<br>TATCA    |                             |                  |                     |                      |
| <i>KRT10B</i> F          | GAGGCTCCTTTGGTG<br>GAGGA    | chr11:21835224<br>-21836574 | 540              | 1348                | 100053935            |
| <i>KRT10B</i> R          | GCACCACATTGGCAT<br>TATCA    |                             |                  |                     |                      |
| <i>KRT14</i> F           | CACCGTGGACAATGC<br>TAATG    | chr11:21200031<br>-21201000 | 258              | 970                 | 100053489            |
| <i>KRT14</i> R           | CTCACCTGGCCTCTCA<br>GGCT    |                             |                  |                     |                      |
| <i>KRT42</i> F           | GGAGGACTGGTTCTT<br>CAGCA    | chr11:21158291<br>-21159359 | 268              | 1069                | 100066586            |
| <i>KRT42</i> R           | CATGTCACAGCGCAG<br>CTC      |                             |                  |                     |                      |
| <i>KRT124</i> Mid F      | GGAAGTGGGATGATG<br>TCTGG    | chr6:69519215-<br>69521326  | 261              | 2112                | 100061458            |
| <i>KRT124</i> Mid R      | CATGGGCTCGATGTT<br>GG       |                             |                  |                     |                      |
| <i>KRT124</i> 3' F       | GTGCAGACTCACTGG<br>GGAAG    | chr6:69510070-<br>69511624  | 214              | 1552                | 100061458            |
| <i>KRT124</i> 3' R       | TTAGCTCCTATAACTC<br>CTCTGGT |                             |                  |                     |                      |

155

156 <sup>†</sup>Primer names indicate target equine gene name and forward (F) or reverse (R) primer.



157 ‡Gene ID: Gene identification number, as per the National Center for Biotechnology Information  
158 (NCBI) database.

159

160 *RNA extraction:* Archived snap-frozen tissue was pulverized using a liquid nitrogen-  
161 chilled, ELIMINase-treated (Decon Labs Inc, King of Prussia, PA, USA) stainless steel mortar  
162 and pestle (Bio-pulverizer™, BioSpec Products, Bartlesville, OK, USA) prior to total RNA  
163 extraction. Next, total RNA was extracted using the RNeasy Fibrous Tissue Mini Kit (Qiagen,  
164 Valencia, CA, USA), by a modified version of the manufacturer's instructions, as follows, to  
165 allow for complete disruption and homogenization of the highly fibrous lamellar tissue.  
166 Pulverized tissue samples were mixed with 300 µl Buffer RLT, 590 µl RNase-free water, and 10  
167 µl proteinase K by gentle vortexing, and incubated at 55°C for 10 min. This mixture was then  
168 homogenized by repeated (5-10x) aspiration through an 18 g hypodermic needle and syringe and  
169 subjected to centrifugation at 10,000 x g for 10 min. The resulting supernatant was then removed  
170 and mixed with 0.5 volume of 100% ethanol, added to the provided RNeasy Mini column in 700  
171 µl increments, and subjected to centrifugation 10,000 x g. RNA retained on the RNeasy column  
172 was retrieved by adding 350 µl Buffer RW1 and subjecting it to centrifugation for 15 s at 10,000  
173 x g. DNase treatment and subsequent buffer RW1 and RPE steps were then performed according  
174 to the manufacturer's instructions, including the optional final centrifuge step. Final RNA elution  
175 was done once in a total volume of 50 µl of RNase-free water. Total RNA was quantified using a  
176 Nanodrop 2000 spectrophotometer (Thermo Fisher Scientific, Waltham, MA, USA). Quality was  
177 confirmed by checking A260/A280 ratios and ensuring they were 2.0±0.1 for all samples tested.

178 *Qualitative RT-PCR:* Reverse transcriptase-polymerase chain reaction (RT-PCR) was  
179 carried out on an Eppendorf Mastercycler thermocycler (Eppendorf, Hamburg, Germany) in a

180 single step using the Qiagen OneStep RT-PCR Kit (Qiagen), according to the manufacturer's  
181 instructions, in a total reaction volume of 25  $\mu$ l using 100 ng of total RNA. The RT reaction was  
182 done at 50°C for 30 min. The PCR cycling conditions which immediately followed were as  
183 follows: 95°C activation step (15 min, 1x) followed by 30 cycles of 3-step PCR (94°C denature  
184 for 30 sec, 50°C anneal for 30 sec, 72°C extension for 1 min). The *KRT42* product was produced  
185 with the same overall method above but with the following modifications: 66°C anneal; 40 PCR  
186 cycles; 2 min extension per cycle with a final 10 min extension (also at 72°C) following  
187 completion of all 40 PCR cycles. RT-PCR products were subjected to agarose gel  
188 electrophoresis, visualized with SYBR Safe™ DNA stain (Thermo Fisher Scientific, Waltham,  
189 MA, USA) and imaged on a UV transilluminator with a digital camera and ethidium bromide  
190 filter (Canon G10, Tokyo, Japan).

191

## 192 **2.4 In situ hybridization**

193 Digoxigenin (DIG)-labeled riboprobes that included unique DNA sequences encoding  
194 *KRT14* and *KRT124* were produced by gene synthesis. Unique DNA sequences encoding *KRT14*  
195 and *KRT124* were produced by gene synthesis. For *KRT14*, a 297 bp region at the 3' end of the  
196 mRNA sequence (NM\_001346198; bp 1371-1667) was synthesized. To facilitate cloning, 5'  
197 Not1 and 3' Kpn1 restriction sites were included in the synthesized DNA fragment. For *KRT124*,  
198 a specific sequence of 684 bp was synthesized that included the 3' end of the coding sequence  
199 and a portion of the 3' UTR (XM\_001504397.3; bp 1623-2307). 5' Not1 and 3' Xho1 restriction  
200 sites were included in the DNA synthesis. The synthesized DNAs were cloned into pBluescript  
201 SK (+) vectors at the multi-cloning site, which includes T7 and T3 RNA polymerase promoter  
202 sequences. Plasmid construction was verified by Sanger sequencing (data not shown). All gene

203 synthesis and cloning were performed by Genscript (genscript.com). Digoxigenin (DIG)-labeled  
204 riboprobes were synthesized from T7 (for antisense probe synthesis) and T3 (for sense probe  
205 synthesis) promoters using MEGAscript Transcription kits (Ambion, Thermo Fisher Scientific)  
206 according to the manufacturer's protocol.

207 In situ hybridization was performed as described, using standard methods [30]. Briefly,  
208 FFPE tissue sections were deparaffinized for 2x10 min in xylene, followed by rehydration in a  
209 graded ethanol series (100%, 75%, 50% and 25%, 3 min each) and digested for 5 min with  
210 proteinase K (10 $\mu$ g/mL; Ambion). Tissue sections were allowed to hybridize overnight in a  
211 humid chamber at 65°C with 1 ng/ $\mu$ L of sense (negative probe) or antisense (positive probe)  
212 DIG-labeled riboprobes in hybridization buffer containing 50% formamide. After washes in  
213 saline-sodium citrate buffer, the sections were incubated with alkaline phosphatase-conjugate  
214 anti-DIG Fab fragments (#11093274910, 1:5000, SigmaAldrich, St. Louis, MO, USA) in a  
215 humid chamber overnight at 4°C. After washing in PTB (Phosphate Buffered Saline + 0.2%  
216 Triton x-100 + 0.1% BSA), labeled probe was visualized using NBT/BCIP substrate (Roche  
217 Diagnostics, Indianapolis, IN, USA) resulting in a blue/purple precipitate. PTw buffer  
218 (Phosphate Buffered Saline + 0.1% Tween) was used to stop the reaction. Sections were  
219 mounted in 80% glycerol/PTw. Images were collected on a Nikon Nti microscope using a Nikon  
220 DS /Ti2 color camera and Nikon Elements software (Nikon Instruments, Inc., Melville, NY,  
221 USA). Typically images were collected at 10X (brightfield) or at 20X (DIC optics).

222

## 223 **2.5 Monoclonal antibodies**

224 **K42 mAb:** The entire coding sequence of *KRT42* (gene ID: 100066586) was amplified using  
225 gene-specific primers and the total RNA, RT-PCR, and agarose gel electrophoresis methods

226 described in section 2.2. These primer sequences were as follows:  
227 ATGGCTGCCACCACCACCAC (forward primer) and GCGATGGCTGCCCCTTGA (reverse  
228 primer). The corresponding genomic location is chr11 + 21153825-21160809 (EquCab2.0).  
229 Following excision of the band from the agarose gel, K42 was expressed as a fusion protein with  
230 equine IL-4 as previously described [31]. In brief, the 1416-bp product was sub-cloned into the  
231 mammalian expression vector (pcDNA3.1 (-)/Myc-His, version B, Invitrogen, Carlsbad, CA,  
232 USA) containing equine IL-4 (eIL-4) [31], sequenced for correctness, and used to transiently  
233 transfect ExpiCHO-S cells, as per manufacturer's instructions (Thermo Fisher Scientific). The  
234 serum-free cell culture supernatant was harvested after 6 days of incubation and rIL-4/K42  
235 fusion protein was purified, using a HiTrap NHS-Activated HP affinity column coupled with  
236 aIL-4 monoclonal antibodies and an ÄKTA Fast Protein Liquid Chromatography (FPLC)  
237 instrument (GE Healthcare, Piscataway, NJ, USA). Immunizations, subsequent cell fusion, and  
238 mAb screening and selection were performed as previously described [31-33]. Briefly, one  
239 BALB/c mouse was immunized with 2 µg purified rIL-4/K42 fusion protein initially followed by  
240 4 injections every 2-3 weeks of 1 µg protein with an adjuvant (Adjuvant MM, Gerbu,  
241 Heidelberg, Germany). Three booster injections of 1 µg of rIL-4/K42 without adjuvant were  
242 performed prior to euthanasia. Monoclonal antibodies (mAbs) were generated by fusion of  
243 splenic B cells from the immunized mouse and murine myeloma cells, as previously described  
244 [32].

245 **K124:** K124 mAbs were produced by Genscript (genscript.com, Piscataway, NJ, USA) by  
246 immunizing Balb/c mice with synthetic peptides targeting N-terminal and C-terminal regions of  
247 equine K124 (gene ID: 100061458) conjugated to keyhole limpet hemocyanin immunogen  
248 followed by splenic lymphocyte fusion with myeloma type SP2/0 cells. Three anti-K124 mAbs

249 were evaluated in our laboratory, and are designated here as K124A (clone 9H8G1, murine  
250 isotype IgG2a), targeting the 14 amino acid peptide, (SVSQGGKSFGGGFG) from positions 36-  
251 49 of the N-terminal region, and K124C (clone 4G6E9, murine isotype IgG1) and K124D (clone  
252 4G7A3, murine isotype IgG2b), targeting (RIISKTSTKRSYRS), the last 14 amino acids (508-  
253 521) of the C-terminal region. Unpurified hybridoma supernatant was used for all K124 mAb  
254 experiments.

255

## 256 **2.6 Immunoblot analysis**

257 Total protein extraction and concentration determination were performed as previously described  
258 [18] from the following snap frozen tissues: hoof lamellar, haired skin, and hoof coronet, corneal  
259 limbus, chestnut (an epidermal callus on the medial foreleg proximal to the carpus), tongue, oral  
260 mucosa, and preputial unhaired (glabrous) skin. SDS-PAGE and immunoblotting were  
261 performed as previously described [18], with 2-8  $\mu$ g total protein loaded per lane and the  
262 following dilutions of mouse mAbs: anti-K14 (1:500; clone LL002, Abcam Inc., Cambridge,  
263 UK), anti-K42 (1:500), or anti-K124, clones K124A, K124C, or K124D (1:10) followed by  
264 secondary goat-anti-mouse-horse radish peroxidase (HRP; 1:5,000, Jackson ImmunoResearch,  
265 Inc, West Grove, PA, USA) and chemiluminescence detection by incubation for 1 min with 79  
266  $\mu$ M p-coumaric acid and 500  $\mu$ M luminol mixed 1:1 with  $3.6 \times 10^{-30}$ % hydrogen peroxide, both in  
267 100 mM TRIS-HCl, pH 8.5 (all reagents: Sigma-Aldrich) followed by exposure to x-ray film  
268 (Hyperfilm™ ECL, GE Healthcare) for 1-3 min and x-ray film development. K124 and K42  
269 immunoblots were reprobed with anti-keratin K14 and mouse anti- $\beta$ -actin-HRP mAb (K124  
270 blots; 1:15,000, clone AC-15; Sigma-Aldrich) or anti- $\beta$ -actin-HRP alone (K42 blots) without  
271 stripping to demonstrate equal protein load. Following immunoblotting, proteins were visualized

272 by staining with Amido Black staining solution (Sigma-Aldrich) according to manufacturer's  
273 directions.

274

## 275 **2.7 Immunofluorescence**

276 Indirect immunofluorescence using fluorescein-conjugated wheat germ agglutinin (F-  
277 WGA, Vector Laboratories, Burlingame, CA, USA) as a counterstain on paraformaldehyde-  
278 fixed/sucrose-dehydrated/optimal cutting temperature compound (OCT)-embedded frozen tissue  
279 sections was performed as previously described, with the following modifications [28]. Antigens  
280 were unmasked through 20 min in Antigen Unmasking Solution (Vector Laboratories Inc.) in a  
281 100°C steam bath, followed by cooling to RT on ice. Sections were next submerged for 15 min  
282 in 0.1M glycine and four min on ice, followed by 20 min in Background Buster (Innovex  
283 Biosciences Inc., Richmond, CA, USA) at RT. Unpurified mouse anti-K124 mAb, clone K124C  
284 (1:10 dilution) served as primary antibody and goat anti-mouse Alexa Fluor™ 594 antibody  
285 (1:500 dilution; Invitrogen, Thermo Fisher Scientific) as the secondary antibody. Primary and  
286 secondary antibody incubations were for 1h at 23°C in a humidified chamber. All antibodies  
287 were diluted in PBS containing 2% normal goat serum (Jackson ImmunoResearch). All wash  
288 steps following incubation with the primary antibody were done in PBS/0.05% Tween-20.  
289 Sections were mounted and imaged by confocal microscopy as previously described [28].  
290 Primary antibody was omitted to determine background staining.

291 **3. Results**

292 **3.1 *KRT42* and *KRT124* mRNA is detected in hoof lamellae, but not haired skin, cornea, or**  
293 **hoof coronet.**

294 As shown in Fig 2, RT-PCR was performed to determine the qualitative tissue expression of the  
295 major keratin isoforms that we had previously detected as proteins in equine hoof lamellar tissue,  
296 K42 and K124, in the cornea, haired skin, hoof coronet and lamellar tissues. All RT-PCR  
297 products display molecular weights predicted to correspond to mRNA rather than genomic DNA  
298 (Fig 2, Table 1). The basal cell keratin, *KRT14*, was used as a positive control since it is  
299 expressed in all stratified epithelial tissues [34]. *KRT14* is expressed in cornea, haired skin, and  
300 lamellae, *KRT10A* and *KRT10B* expression is restricted to haired skin and of the two, *KRT10B* is  
301 more readily detected by this method. *KRT42* and *KRT124* mRNA is only detected in lamellar  
302 tissue and was not amplified from mRNA isolated from cornea, haired skin, or hoof coronet  
303 tissues.

304

305 **Fig 2: *KRT42* and *KRT124* are expressed in hoof lamellae, but not cornea, haired skin, and**  
306 **coronet.** Representative RT-PCR products from equine cornea, haired skin, hoof lamellae, and  
307 hoof coronet, using primers for *KRT14*, *KRT10A*, *KRT10B*, *KRT42*, and *KRT124*, as indicated to  
308 the right of gels, and separated by agarose gel electrophoresis, produces amplicons of the  
309 expected base pair sizes. RT-PCR products from duplicate experiments were run using RNA  
310 extracts from three different horses (identified by number above pairs of lanes) per tissue. DNA  
311 ladder (M), negative control without template RNA (C), and tissues identified above gels.  
312 Duplicate *KRT10* genes present in separate loci that were individually amplified using specific

313 primers (*K10A* and *K10B*). Two sets of primers were used to amplify two different regions of  
314 *KRT124* (*KRT124* Mid and *KRT124* 3'). Image inverted for ease of viewing.

315

316 **3.2 *KRT124* mRNA localizes to the hoof secondary epidermal lamellae and is absent from**  
317 **hoof coronet and haired skin.**

318 As shown in Fig 3-4, we employed in situ hybridization (ISH) to more precisely localize *KRT124*  
319 expression. *KRT124* was detected by ISH in all regions of the epidermal lamellae except for the  
320 central keratinized axis of the primary epidermal lamellae (Fig 3A). *KRT124* expression was not  
321 detected in the coronet or in haired skin (Fig 3B). Staining was also negative in lamellar tissue  
322 using a *KRT124* sense probe (Fig 3A, lower panels). An abrupt transition from *KRT124*-negative  
323 coronary epidermal tissue to *KRT124*-positive lamellar epidermal tissue is apparent at the  
324 junction between coronet and the first proximal lamella (Fig 3B).

325

326 **Fig 3: *KRT124* mRNA localizes to secondary epidermal lamellae and is absent from hoof**  
327 **coronet. (A)** Representative images of *KRT124* localization to secondary epidermal lamellae  
328 (SEs) by in situ hybridization. *KRT124* localizes to suprabasal cells and, with less intense  
329 staining, to basal cells in all regions along the lamellae. Bottom panels: Representative  
330 differential interference contrast images of *KRT124* sense probe in situ hybridization shown as  
331 negative control. Axial (left) and abaxial (right) lamellar regions shown, corresponding to the  
332 axial and abaxial regions shown in top panel. Scale bar (50  $\mu$ m) applies to all four lower panels.  
333 **(B)** Representative H&E and *KRT124* in situ hybridization images of a longitudinal section of  
334 the coronet and proximal lamella (arrowhead) and haired skin. Area of coronary-lamellar  
335 junction similar to the boxed area in the H&E image shows the abrupt transition from *KRT124*-



336 negative keratinocytes in the coronary epithelium to *KRT124*-positive keratinocytes in a  
337 proximal lamella. All studies: n=3 using samples from 3 horses.

338  
339 Although *KRT124* ISH staining is apparent in both basal and suprabasal cells in some  
340 regions (Fig 3A), it was generally more intense in the suprabasal cells and lighter or absent from  
341 basal cells (Fig 4). *KRT14* ISH, in contrast, is restricted to basal cells in lamellar tissue (Fig 4),  
342 similar to the previously reported localization of K14 protein in healthy lamellar tissue  
343 [16;19;24].

344  
345 **Fig 4: *KRT42* and *KRT124* mRNA localizes to secondary epidermal lamellae and is absent**  
346 **from hoof coronet.** Representative images from in situ hybridization of *KRT14* (left) and  
347 *KRT124* (right) expression in serial sections. *KRT14* is restricted to basal cells, while *KRT124* is  
348 expressed primarily in suprabasal layers. Boxed regions marked on low magnification images are  
349 shown below at higher magnification and include differential interference contrast optics. All  
350 studies: n=3 using samples from 3 horses.

351  
352 **3.3 K42 and K124 monoclonal antibodies specifically detect hoof lamellar proteins on**  
353 **immunoblots.**

354 Monoclonal antibodies were generated against full-length recombinant equine K42 and  
355 against two different peptides from K124, as described in the Materials and Methods section, and  
356 characterized by immunoblotting (Fig 5). As shown in Fig 5A, the anti-K42 mAb detects a single  
357 band from lamellar tissue extract at the expected relative molecular mass (50 kDa), and co-  
358 migrates with the second most abundant type 1 keratin in lamellar tissue, K14 [18]. Three anti-

359 K124 mAb clones, K124A (against an N-terminal peptide), K124C, and K124D (the latter two  
360 against a single C-terminal peptide) were immunoreactive for a single major band at the expected  
361 relative molecular mass (54 kDa) in lamellar tissue extract (Fig 5A). The K14/K42, and K124  
362 immunoblot bands correspond to two major protein bands that are visible by protein stain, even  
363 at the low total protein loads used for these studies (Fig 5A), as previously reported [18]. Anti-  
364 K124 C-terminal peptide clones K124C and K124D also detected a lower relative molecular  
365 mass minor doublet band that is not visible by protein staining in some lamellar tissue samples  
366 under these immunoblotting conditions (Fig 5B).

367

368 **Fig 5: Detection of K14, K42, and K124 by immunoblotting with monoclonal antibodies.**

369 Representative immunoblots using mouse monoclonal anti-K14, anti-K42, or anti-K124, clones  
370 A, C, or D followed by secondary goat-anti-mouse-horse radish peroxidase (HRP) (n=5 using  
371 samples from 3 horses). (A) Representative images of K14, K42, K124A, and K124C  
372 immunoblot strips (right images) and amido black stain for protein of each blot (left images)  
373 from the same SDS-PAGE gel with 2 µg lamellar protein loaded per lane. K14, K42, K124A and  
374 K124C immunoblots detect a single band at the expected relative molecular weight in lamellar  
375 tissue. K14 and K42 co-localize to 50 kDa band and the K124 mAbs are immunoreactive with a  
376 54 kDa band. (B) K14, K42, and K124 immunoblots of epidermal and surface epithelial tissue  
377 extracts demonstrate the specificity of the K124 mAbs to lamellar tissue. La: lamellar; HS:  
378 haired skin; Co: coronary; Li: Corneal limbus; Ch: chestnut; To: tongue; OM: oral mucosa; US:  
379 unhaired (glabrous) skin. Total protein load per lane indicated above tissue labels. K124 and K42  
380 immunoblots reprobed with K14 and β-actin (K124 blots) or β-actin alone (K42 blots) without  
381 stripping to demonstrate equal load. K42 mAb detects a single band in lamellar, chestnut, and

382 unhaired skin tissues and a doublet band in haired skin, coronary, tongue, and oral mucosa  
383 tissues. All three K124 mAbs detect a single major band and, for K124C and K124D, an  
384 additional, lower relative molecular mass minor doublet band only in lamellar tissue. Increased  
385 protein load confirms negative K124 mAb cross-reactivity to keratins in coronet and haired skin  
386 (last two lanes).

387

388 Immunoblotting with multiple stratified epithelial tissues was performed to evaluate  
389 antibody cross-reactivity (Fig 5B). The anti-K42 mAb detects a single band in lamellar, chestnut,  
390 and unhaired skin tissues and a doublet band in haired skin, coronary, tongue, and oral mucosa  
391 tissues. Immunoreactivity to non-lamellar tissues is less apparent than immunoreactivity to  
392 lamellar tissue following additional washes, but still clearly present for haired skin, coronary,  
393 tongue, and oral mucosa, consistent with antibody cross-reactivity at this antibody concentration  
394 (lower blot, Fig 5B). All three anti-K124 mAbs show no cross-reactivity to any of the non-  
395 lamellar stratified epithelial tissues tested. Increased protein load confirmed negative anti-K124  
396 mAb cross-reactivity to keratins in coronet and haired skin (last two lanes for each immunoblot).  
397 Immunoblots with affinity-purified anti-K124, clones A and C, detected a single 54 kDa band  
398 with an antibody dilution of 1:5,000 and as little as 25 ng total lamellar protein load (data not  
399 shown).

400

#### 401 **3.4 K124 monoclonal antibodies specifically localize to hoof epidermal lamellae..**

402 As shown in Fig 6, indirect immunofluorescence using the anti-K124C mAb on cryosections  
403 demonstrates localization of K124 to the epidermal lamellae in a pattern that resembles that  
404 obtained by *KRT124* ISH (Fig 3-4). K124 localizes to suprabasal cells, and to a lesser degree,

405 basal cells of all secondary epidermal lamellae. The keratinized axes of the primary epidermal  
406 lamellae are negative. Anti-K124C did not show any specific immunoreactivity to coronet or  
407 haired skin. Negative control parallel-run experiments on serial lamellar tissue cryosections  
408 showed some non-specific staining or autofluorescence of red blood cells, but no specific anti-  
409 K124C immunoreactivity (S1 Fig). The anti-K124A mAb showed some cross-reactivity to  
410 coronet and haired skin by indirect immunofluorescence and was not fully characterized for  
411 indirect immunofluorescence (data not shown). Preliminary indirect immunofluorescence studies  
412 with anti-K124D showed result similar to those with anti-K124C (data not shown).

413

414 **Fig 6: Localization of K124 to basal and suprabasal secondary epidermal lamellar cells by**  
415 **indirect immunofluorescence.** Paraformaldehyde-fixed/sucrose-dehydrated/OCT-embedded  
416 cryosections from lamellar, coronet, and haired skin frozen tissues subjected to indirect  
417 immunofluorescence using the K124C mAb and fluorescein-conjugated wheat germ agglutinin  
418 (WGA) as a counterstain (n=3 using samples from 3 horses). K124C localizes to suprabasal  
419 cells, and to a lesser degree, basal cells of all SELs. Coronet and haired skin show negative  
420 staining for K124, with some autofluorescence of red blood cells visible in dermal tissues. (D):  
421 dermis; \*: Keratinized axis of PEL. Scale bar = 20  $\mu$ m. The same image adjustment to enhance  
422 red channel for ease of viewing was applied to all images.

423

#### 424 4. Discussion

425 To our knowledge, this is the first report of the use of isoform-specific antibodies to localize  
426 a nail unit-specific keratin isoform (K124) in any species. In addition, this is the first  
427 demonstration that the expression of K124 is restricted to the equine (*E. caballus*) hoof lamellae,  
428 the highly folded inner epithelium of the hoof capsule, which is homologous to the nail bed of  
429 primates, rodents, and other species, and is absent from the germinative (“coronary”) region of  
430 the proximal hoof wall, which is homologous to the nail matrix [21;35;36]. K124 is the most  
431 abundant type II keratin of lamellar tissue [18] and, shown here (Fig 3, 4, 6), its expression is  
432 increased in suprabasal, compared to basal, lamellar keratinocytes, suggesting it is a terminal  
433 differentiation marker for these cells.

434 *KRT124* and *KRT42* were recently identified by total RNA sequencing from canine and  
435 equine skin, suggesting that transcripts for these keratins are found in equine haired skin,  
436 although this result was not validated by any complementary methods [20]. We amplified neither  
437 *KRT124* nor *KRT42* from haired skin total RNA by RT-PCR (Fig 2), nor did we localize K124 to  
438 haired skin by ISH, immunoblotting, or indirect immunofluorescence histology (Fig 3-6), using  
439 samples from multiple horses of several breeds (S1 Table). It is possible that the discrepancy  
440 relates to the anatomic location of the skin samples used since we collected samples from the  
441 dorsal region of the digit and the location of the skin biopsy used by Balmer, et al., is not  
442 specified [20]. Further investigation of equine skin keratin isoform expression is required to  
443 resolve this issue.

444 The rodent ortholog of *KRT124*, *Krt90* (formerly *Kb15*) and the opossum ortholog (*Kb15*)  
445 have not been characterized beyond genomic mapping and identification as likely functional  
446 genes in those species [22;23]. However, based on the relative protein amounts of K42 and K124

447 in lamellar tissue, we had previously suggested that these keratins hybridize in lamellar tissue,  
448 and are therefore expected to co-localize in the hoof lamellae [18]. Murine *Krt42* (formerly  
449 *K17n*) expression has been localized to the nail matrix and nail bed and functional canine *KRT42*  
450 and *KRT124* genes have been identified, suggesting that the nail bed expression of K42 and  
451 K124/K90 may be conserved across mammalian and marsupial species, but was lost from the  
452 thinner and non-weight-bearing nail units of primates, where both keratins exist only as  
453 pseudogenes [20-22]. Equine *KRT42* and *KRT124* have a more restricted tissue localization than  
454 murine *Krt42* since the latter is expressed in the nail matrix [22], but the former are not  
455 expressed in the homologous coronary region of the hoof wall, as assessed by RT-PCR for  
456 *KRT42* (Fig 2) and multiple methods for *KRT124*/K124 (Fig 2-6). The isoform-specific anti-  
457 K124 mAbs described here may allow protein localization and tissue distribution of K124/K90  
458 in other species.

459 The biology of equine lamellae is also of interest due to the prevalence of equine laminitis, a  
460 common and devastating disease affecting this tissue. Laminitis results in epidermal pathologies  
461 that include abnormal hyperplastic and acanthotic epidermal tissue [37], epidermal dysplasia and  
462 metaplasia, loss of cell adhesion, apoptosis, and necrosis[27], and expression of cellular stress,  
463 activation, and altered differentiation markers [24;38-40]. Similar nail abnormalities involving  
464 the nail bed were recently described in association with ageing in several inbred strains of mice  
465 [41]. Our anti-K124 mAbs will be useful for the investigation of histopathological changes in  
466 lamellar and nail bed keratin expression and as a tissue-specific differentiation marker for *in*  
467 *vitro* studies. Keratins, as the most abundant proteins and as epithelial-specific proteins, are  
468 useful biomarkers of epithelial cell stress, apoptosis and necrosis in several human diseases,  
469 including various carcinomas [42] and several types of liver disease [43]. K124 could similarly

470 serve as a tissue-specific disease biomarker for equine laminitis and nail unit disease in other  
471 species that express it.

472 In conclusion, we have characterized the expression of keratin isoforms that specifically  
473 localize to the highly specialized inner epithelium of the equine hoof capsule. For the first time,  
474 we have generated and characterized nail unit-specific anti-K124 mAbs, which localize  
475 specifically to the secondary epidermal lamellae and do not cross-react with proteins from  
476 several stratified epithelial tissues. We suggest that these hoof-specific keratins are essential  
477 components of the equine suspensory apparatus of the distal phalanx and provide the mechanical  
478 properties of strength and elasticity that enable single digit, unguligrade locomotion in the  
479 equidae, a signature evolutionary adaptation of this genus.

480 **5. Acknowledgments**

481 CDSS and LC are grateful to Micheal Layden, Jamie Havrilak and Dylan Faltine-Gonzalez for  
482 sharing their expertise, equipment and reagents for in situ hybridizations. HGH thanks Julie  
483 Engiles, Sue Lindborg, Renata Linardi, Mark Modelski and Susan Megee for their work on the  
484 tissue bank.

485

486 **6. References**

487 Reference List

488

- 489 (1) Schweizer J, Bowden PE, Coulombe PA, Langbein L, Lane EB, Magin TM, et al. New  
490 consensus nomenclature for mammalian keratins. *J Cell Biol* 2006;174:169-74.
- 491 (2) Bragulla HH, Homberger DG. Structure and functions of keratin proteins in simple,  
492 stratified, keratinized and cornified epithelia. *J Anatomy* 2009;214:516-59.
- 493 (3) Ramms L, Fabris G, Windoffer R, Schwarz N, Springer R, Zhou C, et al. Keratins as the  
494 main component for the mechanical integrity of keratinocytes. *Proc Natl Acad Sci U*  
495 *S A* 2013;110(46):18513-8.
- 496 (4) Homberg M, Magin TM. Beyond expectations: novel insights into epidermal keratin  
497 function and regulation. *Int Rev Cell Mol Biol* 2014;311:265-306.
- 498 (5) Lane EB, McLean WH. Keratins and skin disorders. *J Pathol* 2004;204(4):355-66.
- 499 (6) Liao H, Sayers JM, Wilson NJ, Irvine AD, Mellerio JE, Baselga E, et al. A spectrum of  
500 mutations in keratins K6a, K16 and K17 causing pachyonychia congenita. *J Derm Sci*  
501 *2007;48:199-205.*
- 502 (7) McGowan KM, Coulombe PA. Keratin 17 expression in the hard epithelial context of  
503 the hair and nail, and its relevance for the pachyonychia congenita phenotype. *J*  
504 *Invest Dermatol* 2000;114(6):1101-7.
- 505 (8) Jin L, Wang G. Keratin 17: a critical player in the pathogenesis of psoriasis. *Med Res*  
506 *Rev* 2014;34(2):438-54.
- 507 (9) Davies HMS, Merritt JS, Thomason JJ. Biomechanics of the equine foot. In: Floyd AE,  
508 Mansmann RA, editors. *Equine Podiatry*. St. Louis, MO: Saunders Elsevier; 2007. p.  
509 42-56.



- 510 (10) Roland ES, Hull ML, Stover SM. Design and demonstration of a dynamometric  
511 horseshoe for measuring ground reaction loads of horses during racing conditions. *J*  
512 *Biomech* 2005;38(10):2102-12.
- 513 (11) Bragulla H, Hirschberg RM. Horse hooves and bird feathers: Two model systems for  
514 studying the structure and development of highly adapted integumentary accessory  
515 organs - The role of the dermo-epidermal interface for the micro-architecture of  
516 complex epidermal structures. *J Exp Zool* 2003;298B:140-51.
- 517 (12) Pollitt CC. The anatomy and physiology of the suspensory apparatus of the distal  
518 phalanx. *Vet Clin North Am Equine Pract* 2010;26:29-49.
- 519 (13) MacFadden BJ. What's the use? Functional morphology of feeding and locomotion.  
520 *Fossil horses: Systematics, paleobiology, and evolution of the family equidae.* New  
521 York, NY: Cambridge University Press; 1992. p. 229-62.
- 522 (14) Fleckman P, Jaeger K, Silva KA, Sundberg JP. Comparative anatomy of mouse and  
523 human nail units. *Anat Rec (Hoboken)* 2013;296(3):521-32.
- 524 (15) Hood DM. Laminitis in the horse. *Vet Clin North Am Equine Pract* 1999;15(2):287-  
525 94.
- 526 (16) Wattle O. Cytokeratins of the equine hoof wall, chestnut and skin: bio- and  
527 immunohisto-chemistry. *Equine Vet J Suppl* 1998;26:66-80.
- 528 (17) Wattle O. Cytokeratins of the stratum medium and stratum internum of the equine  
529 hoof wall in acute laminitis. *Acta Vet Scand* 2000;41(4):363-79.
- 530 (18) Carter RA, Shekk V, de Laat MA, Pollitt CC, Galantino-Homer HL. Novel keratins  
531 identified by quantitative proteomic analysis as the major cytoskeletal proteins of  
532 equine (*Equus caballus*) hoof lamellar tissue. *J Anim Sci* 2010 Jul 9;88(12):3843-55.
- 533 (19) Linardi R, Megee S, Mainardi S, Senoo M, Galantino-Homer H. Expression and  
534 localization of epithelial stem cell and differentiation markers in equine skin, eye  
535 and hoof. *Vet Dermatol* 2015;26(4):213-e47.
- 536 (20) Balmer P, Bauer A, Pujar S, McGarvey KM, Welle M, Galichet A, et al. A curated  
537 catalog of canine and equine keratin genes. *PLoS One* 2017;12(8):e0180359.
- 538 (21) Tong X, Coulombe PA. A novel mouse type I intermediate filament gene, keratin 17n  
539 (K17n), exhibits preferred expression in nail tissue. *J Invest Dermatol*  
540 2004;122:965-70.
- 541 (22) Hesse M, Zimek A, Weber K, Magin TM. Comprehensive analysis of keratin gene  
542 clusters in humans and rodents. *European Journal of Cell Biology* 2004;83:19-26.

- 543 (23) Zimek A, Weber K. The organization of the keratin I and II gene clusters in placental  
544 mammals and marsupials show a striking similarity. *European Journal of Cell*  
545 *Biology* 2006;85:83-9.
- 546 (24) Carter RA, Engiles JB, Megee SO, Senoo M, Galantino-Homer HL. Decreased  
547 expression of p63, a regulator of epidermal stem cells, in the chronic laminitic  
548 equine hoof. *Equine Veterinary Journal* 2011;43(5):543-51.
- 549 (25) Galantino-Homer H, Carter R, Megee S, Engiles J, Orsini J, Pollitt C. The Laminitis  
550 Discovery Database. *J Equine Vet Sci* 2010;30(2):101.
- 551 (26) Pollitt CC. Basement membrane pathology: a feature of acute equine laminitis.  
552 *Equine Veterinary Journal* 1996;28(1):38-46.
- 553 (27) Engiles JB, Galantino-Homer H, Boston R, McDonald D, Dishowitz M, Hankenson KD.  
554 Osteopathology in the equine distal phalanx associated with the development and  
555 progression of laminitis. *J Vet Pathol* 2015;52(5):928-44.
- 556 (28) Clark RK, Galantino-Homer H. Wheat Germ Agglutinin as a Counterstain for  
557 Immunofluorescence Studies of Equine Hoof Lamellae. *Exp Dermatol*  
558 2014;23(9):677-8.
- 559 (29) Untergasser A, Cutcutache I, Koressaar T, Ye J, Faircloth BC, Remm M, et al. Primer3 -  
560 new capabilities and interfaces. *Nucleic Acids Research* 2012;40(15):e115.
- 561 (30) Wolenski FS, Layden MJ, Martindale MQ, Gilmore TD, Finnerty JR. Characterizing the  
562 spatiotemporal expression of RNAs and proteins in the starlet sea anemone  
563 *Nematostella vectensis*. *Nat Protoc* 2013;8:900-15.
- 564 (31) Wagner B, Hillegas JM, Babasyan S. Monoclonal antibodies to equine CD23 identify  
565 the low-affinity receptor for IgE on subpopulations of IgM+ and IgG1+ B-cells in  
566 horses. *Vet Immunol Immunopathol* 2012;146(2):125-34.
- 567 (32) Wagner B, Radbruch A, Rohwer J, Leibold W. Monoclonal anti-equine IgE antibodies  
568 with specificity for different epitopes on the immunoglobulin heavy chain of native  
569 IgE. *Vet Immunol Immunopathol* 2003;92(1-2):45-60.
- 570 (33) Schnabel CL, Wemette M, Babasyan S, Freer H, Baldwin C, Wagner B. C-C motif  
571 chemokine ligand (CCL) production in equine peripheral blood mononuclear cells  
572 identified by newly generated monoclonal antibodies. *Vet Immunol Immunopathol*  
573 2018;204:28-39.
- 574 (34) Porter RM, Lunny DP, Ogden PH, Morley SM, McLean WH, Evans A, et al. K15  
575 expression implies lateral differentiation within stratified epithelial basal cells. *Lab*  
576 *Invest* 2000;80(11):1701-10.

- 577 (35) De Berker D, Wojnarowska F, Sviland L, Westgate GE, Dawber RPR, Leigh IM.  
578 Keratin expression in the normal nail unit: Markers of regional differentiation. *Brit J*  
579 *Dermatol* 2000;142:89-96.
- 580 (36) Daradka M, Pollitt CC. Epidermal cell proliferation in the equine hoof wall. *Equine*  
581 *Veterinary Journal* 2004;36:236-41.
- 582 (37) Collins SN, Van Eps AW, Kuwano A, Pollitt CC. The Lamellar Wedge. *Vet Clin North*  
583 *Am Equine Pract* 2010;26:179-95.
- 584 (38) Leise BS, Watts M, Roy S, Yilmaz S, Alder H, Belknap JK. Use of laser capture  
585 microdissection for the assessment of equine lamellar basal epithelial cell signalling  
586 in the early stages of laminitis. *Equine Vet J* 2015;47(4):478-88.
- 587 (39) Cassimeris L, Engiles JB, Galantino-Homer H. Detection of endoplasmic reticulum  
588 stress and the unfolded protein response in naturally-occurring endocrinopathic  
589 equine laminitis. *BMC Vet Res*. In press 2018.
- 590 (40) Faleiros RR, Nuovo GJ, Belknap JK. Calprotectin in myeloid and epithelial cells of  
591 laminae from horses with black walnut extract-induced laminitis. *J Vet Intern Med*  
592 2009;23(1):174-81.
- 593 (41) Linn SC, Mustonen AM, Silva KA, Kennedy VE, Sundberg BA, Bechtold LS, et al. Nail  
594 abnormalities identified in an ageing study of 30 inbred mouse strains. *Exp*  
595 *Dermatol* 2019;28:383-90.
- 596 (42) Linder S, Olofsson MH, Herrmann R, Ulukaya E. Utilization of cytokeratin-based  
597 biomarkers for pharmacodynamic studies. *Expert Rev Mol Diagn* 2010;10(3):353-9.
- 598 (43) Ku NO, Strnad P, Bantel H, Omary MB. Keratins: Biomarkers and modulators of  
599 apoptotic and necrotic cell death in the liver. *Hepatology* 2016;64(3):966-76.  
600  
601  
602

603 **7. Supporting Information**

604

605 **S1 Table: Breed, age, and sex of horses (*E. caballus*) used in experiments**

606

607 **S1 Fig: Indirect immunofluorescence negative control for lamellar tissue.** Lamellar tissue

608 cryosection, serial to the one shown in Fig 6, subjected to indirect immunofluorescence and

609 fluorescein-conjugated wheat germ agglutinin (WGA) as a counterstain, omitting the K124C

610 mAb to show non-specific staining (n=3 using samples from 3 horses, representative image

611 shown). (A) Red channel, secondary antibody alone (white). (B) Secondary antibody alone (red)

612 and fluorescein-WGA counterstain (green). Scale bar = 20  $\mu\text{m}$ . The same image adjustment to

613 enhance red channel for ease of viewing as that applied to Fig 6 was applied to these images.

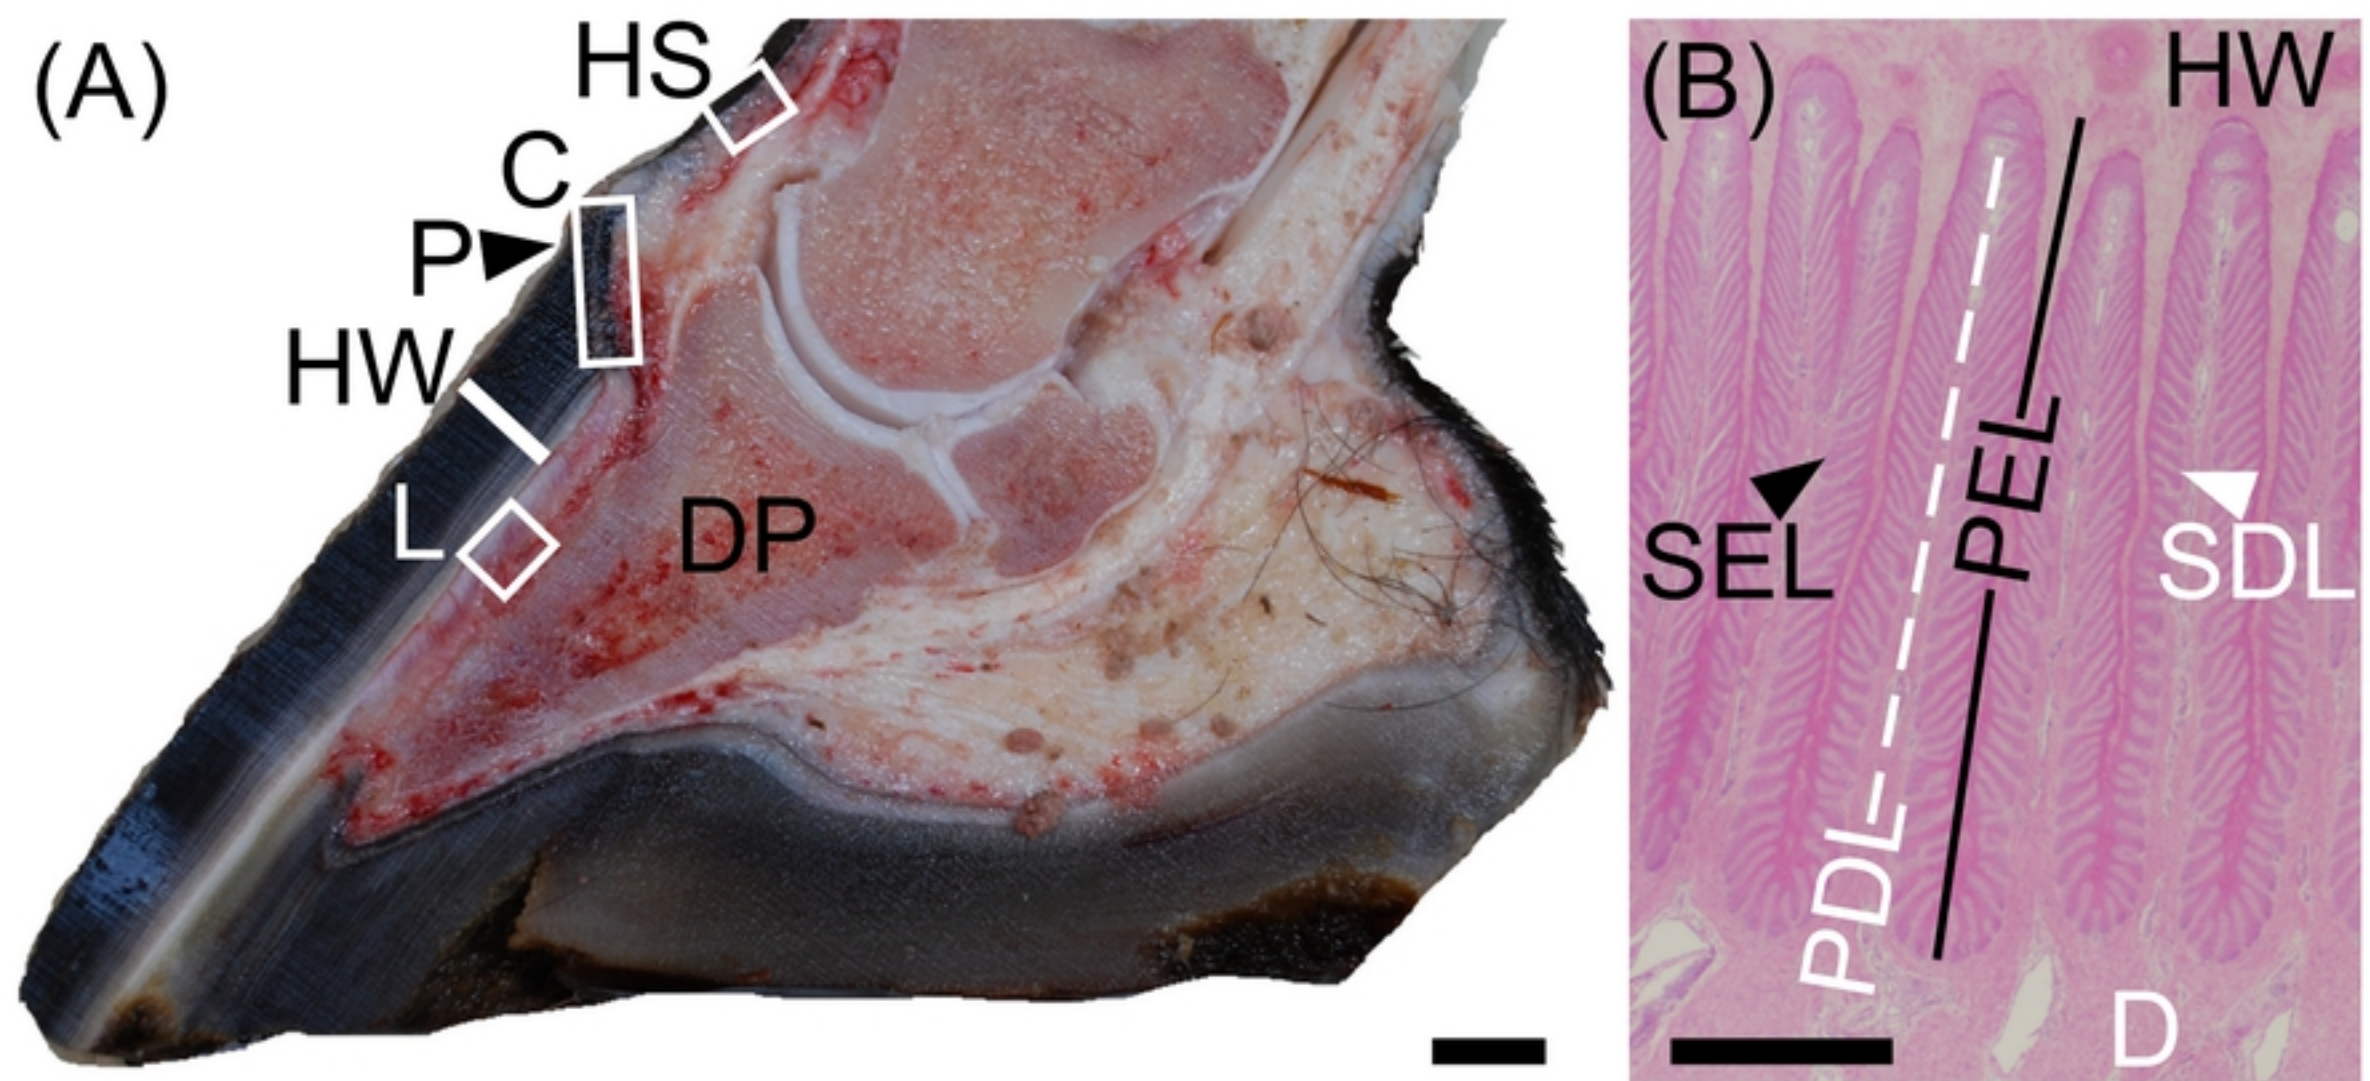

Figure 1



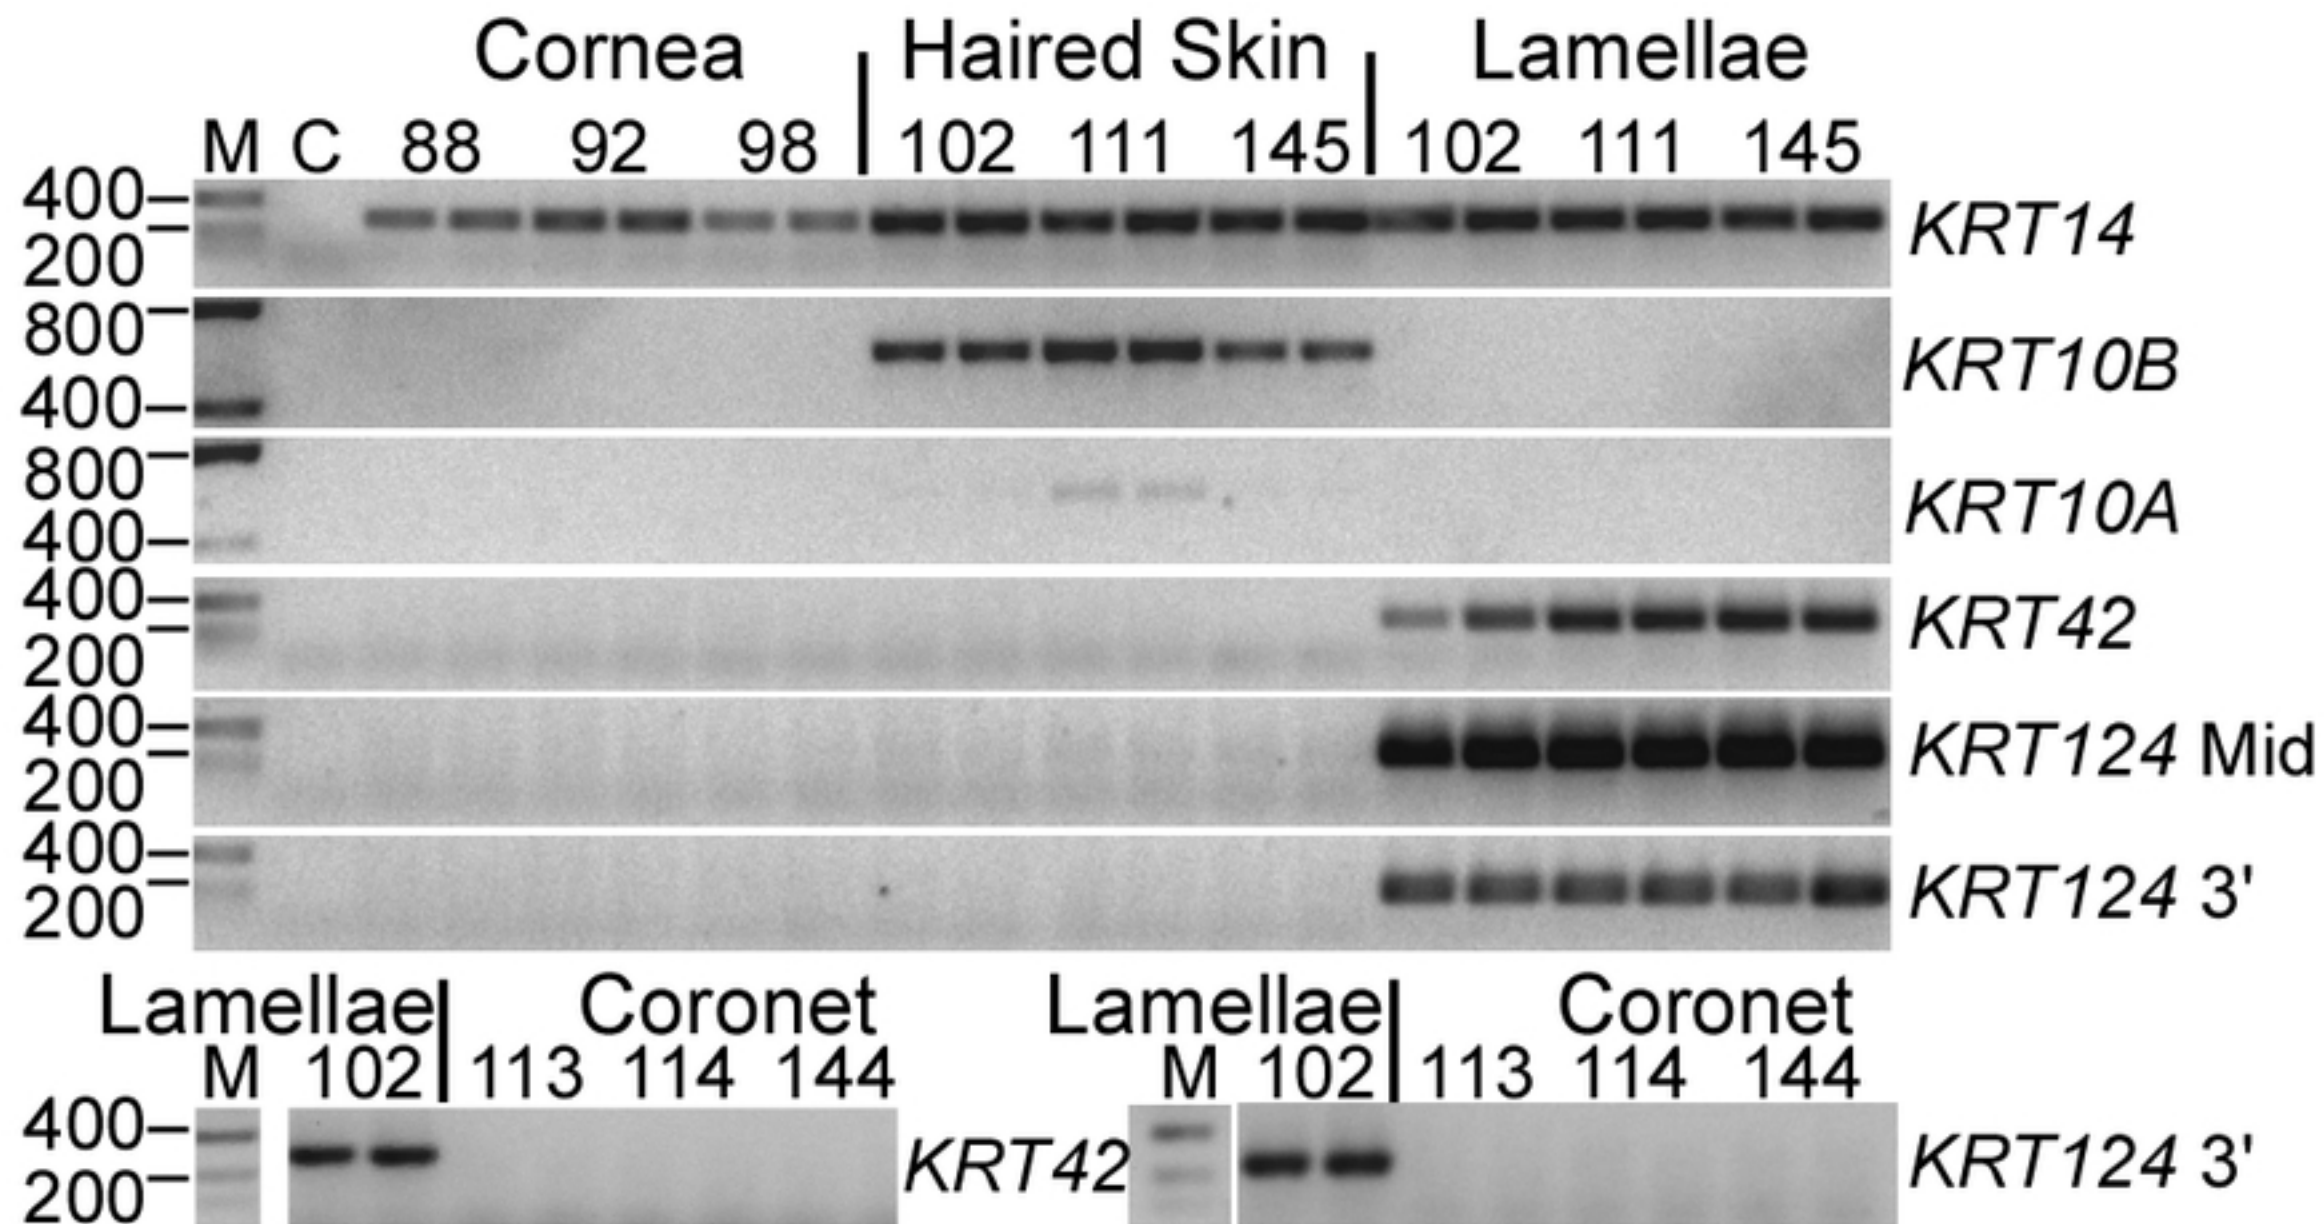

Figure 2



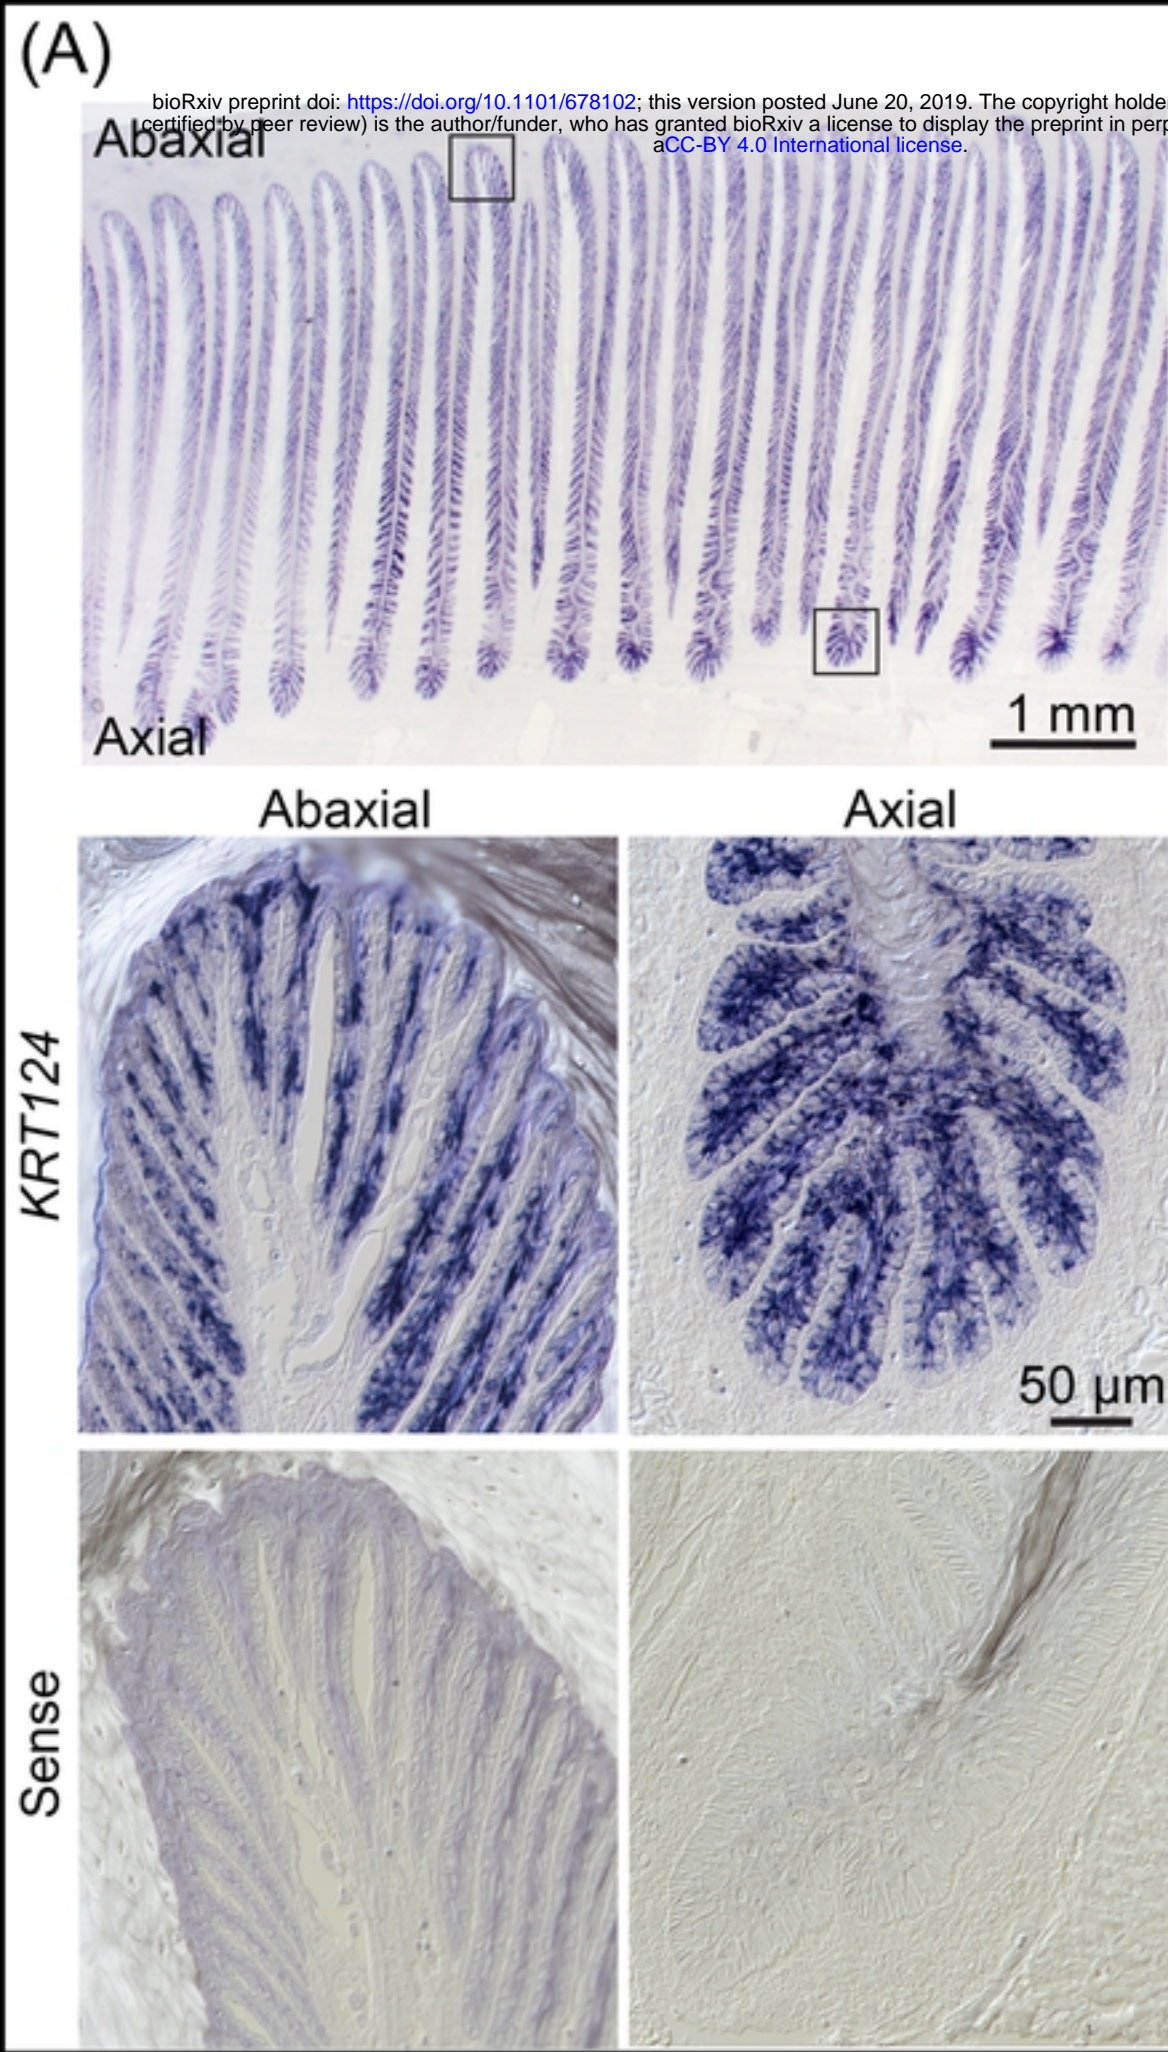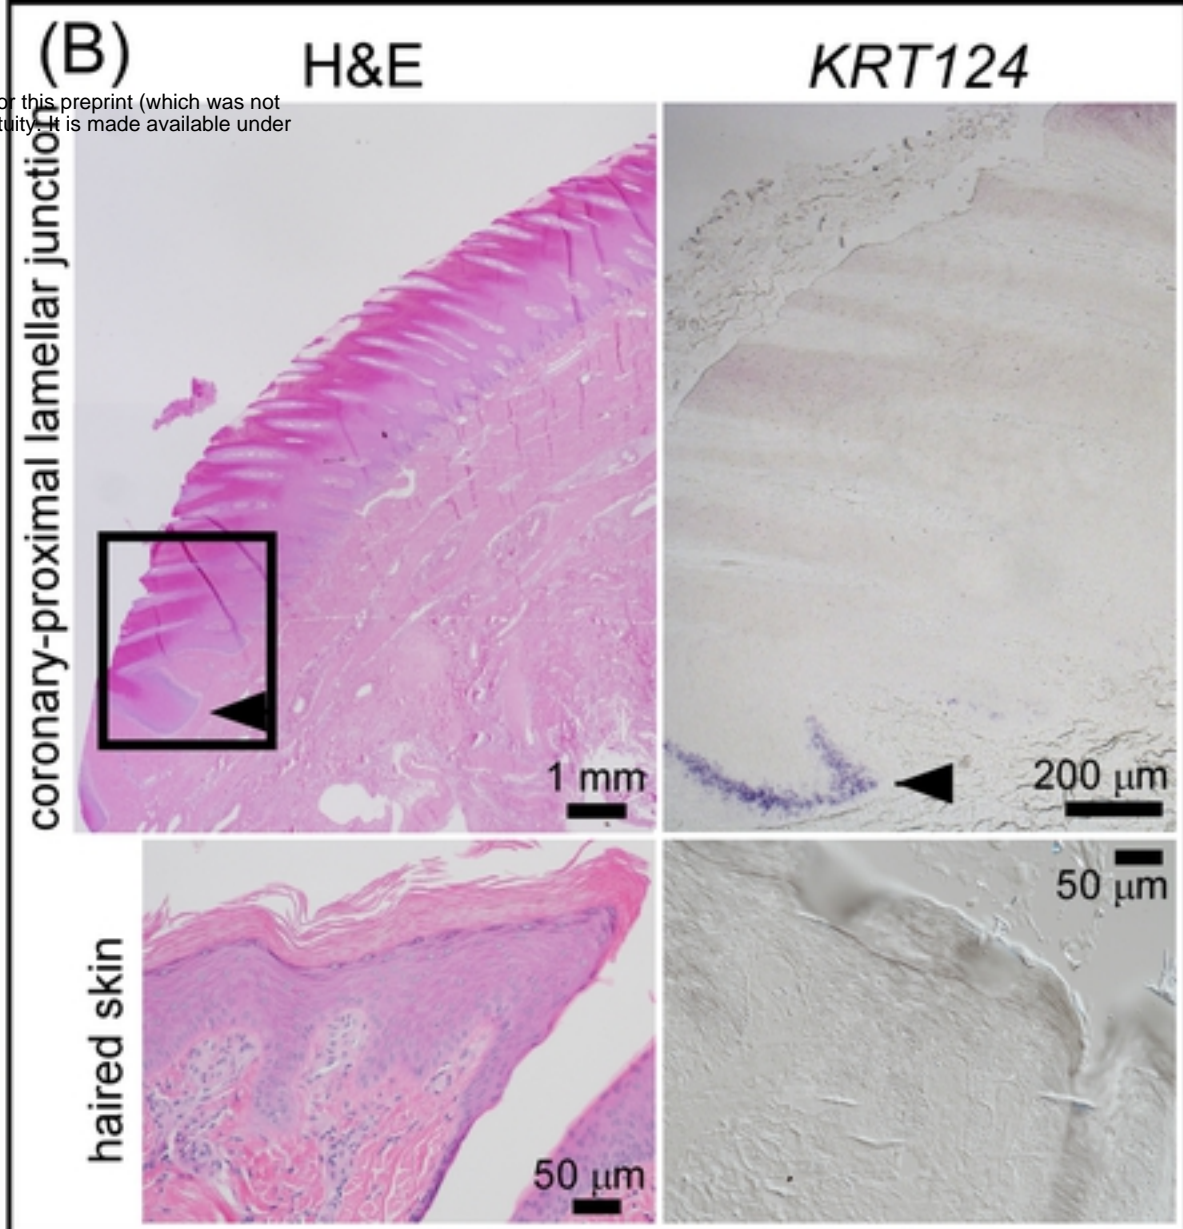

Figure 3



KRT14

KRT124

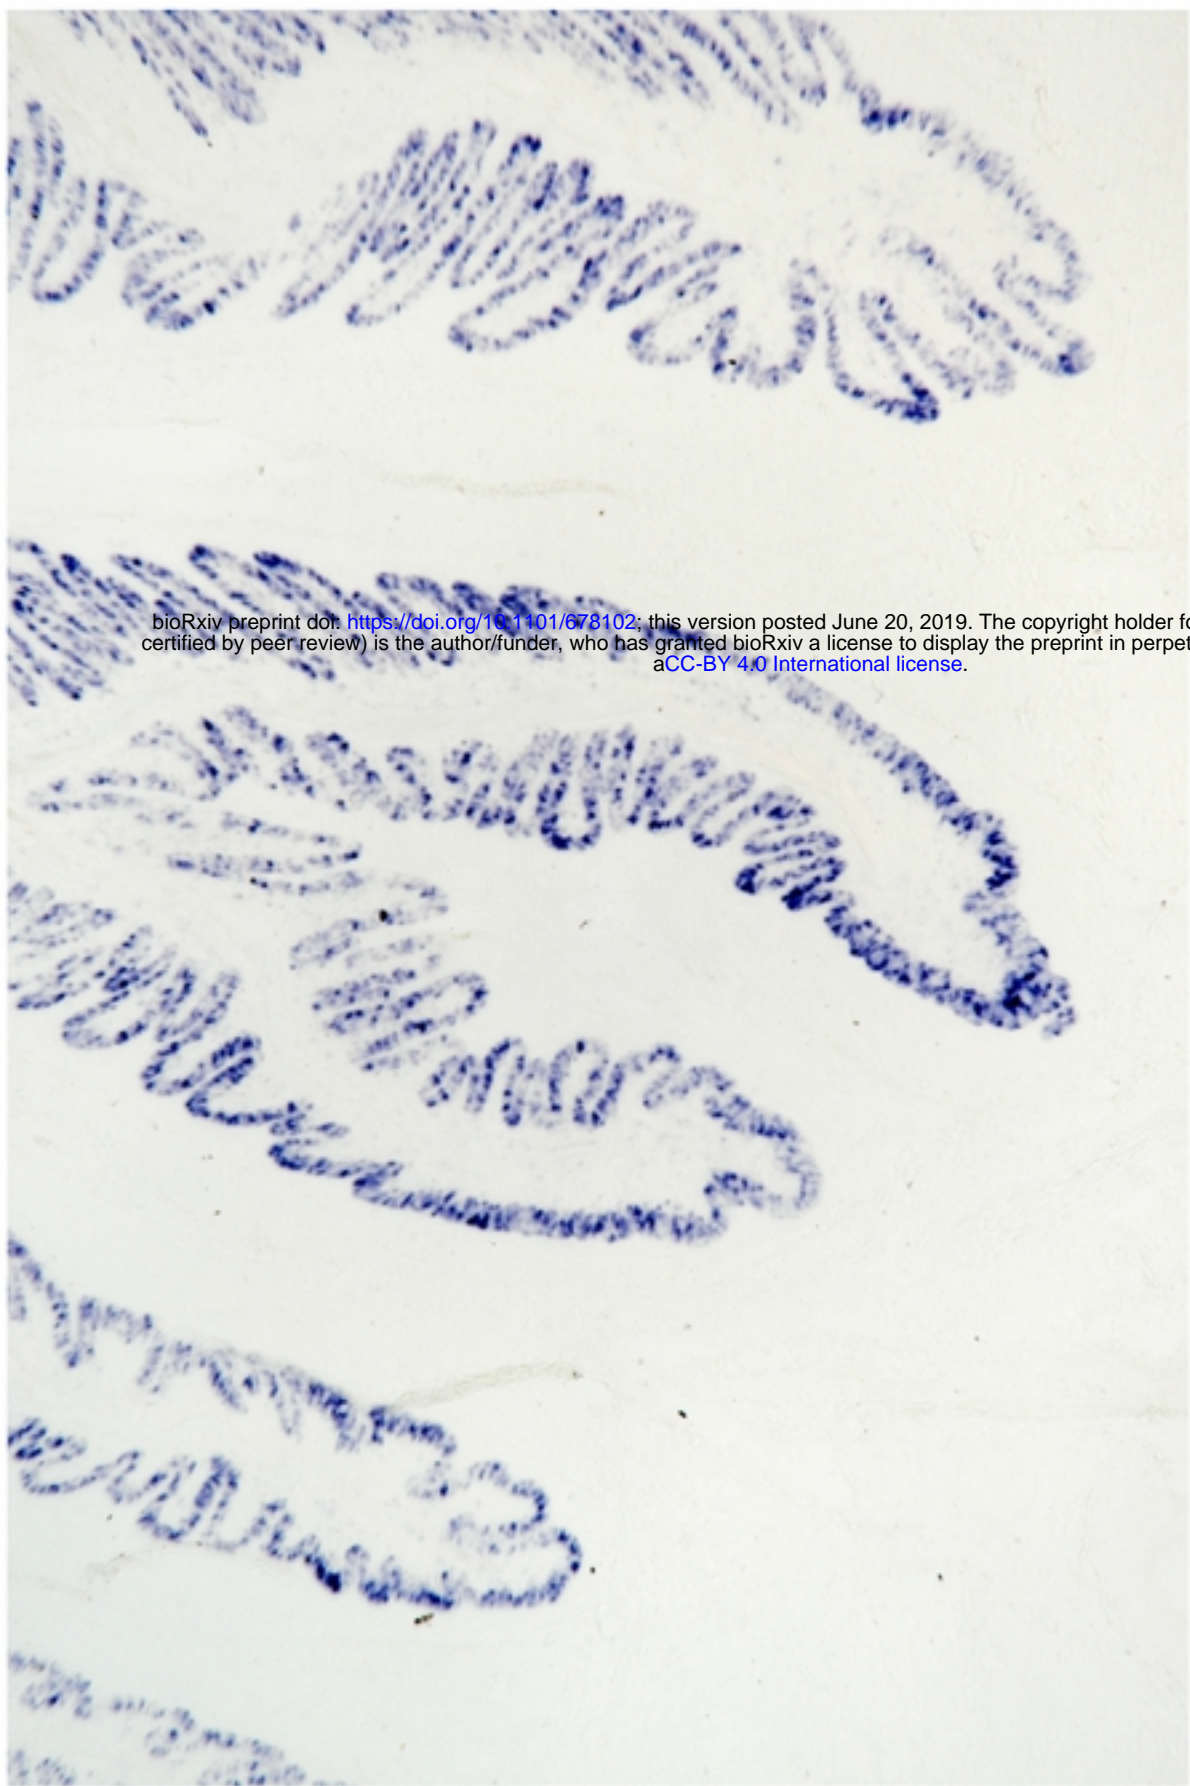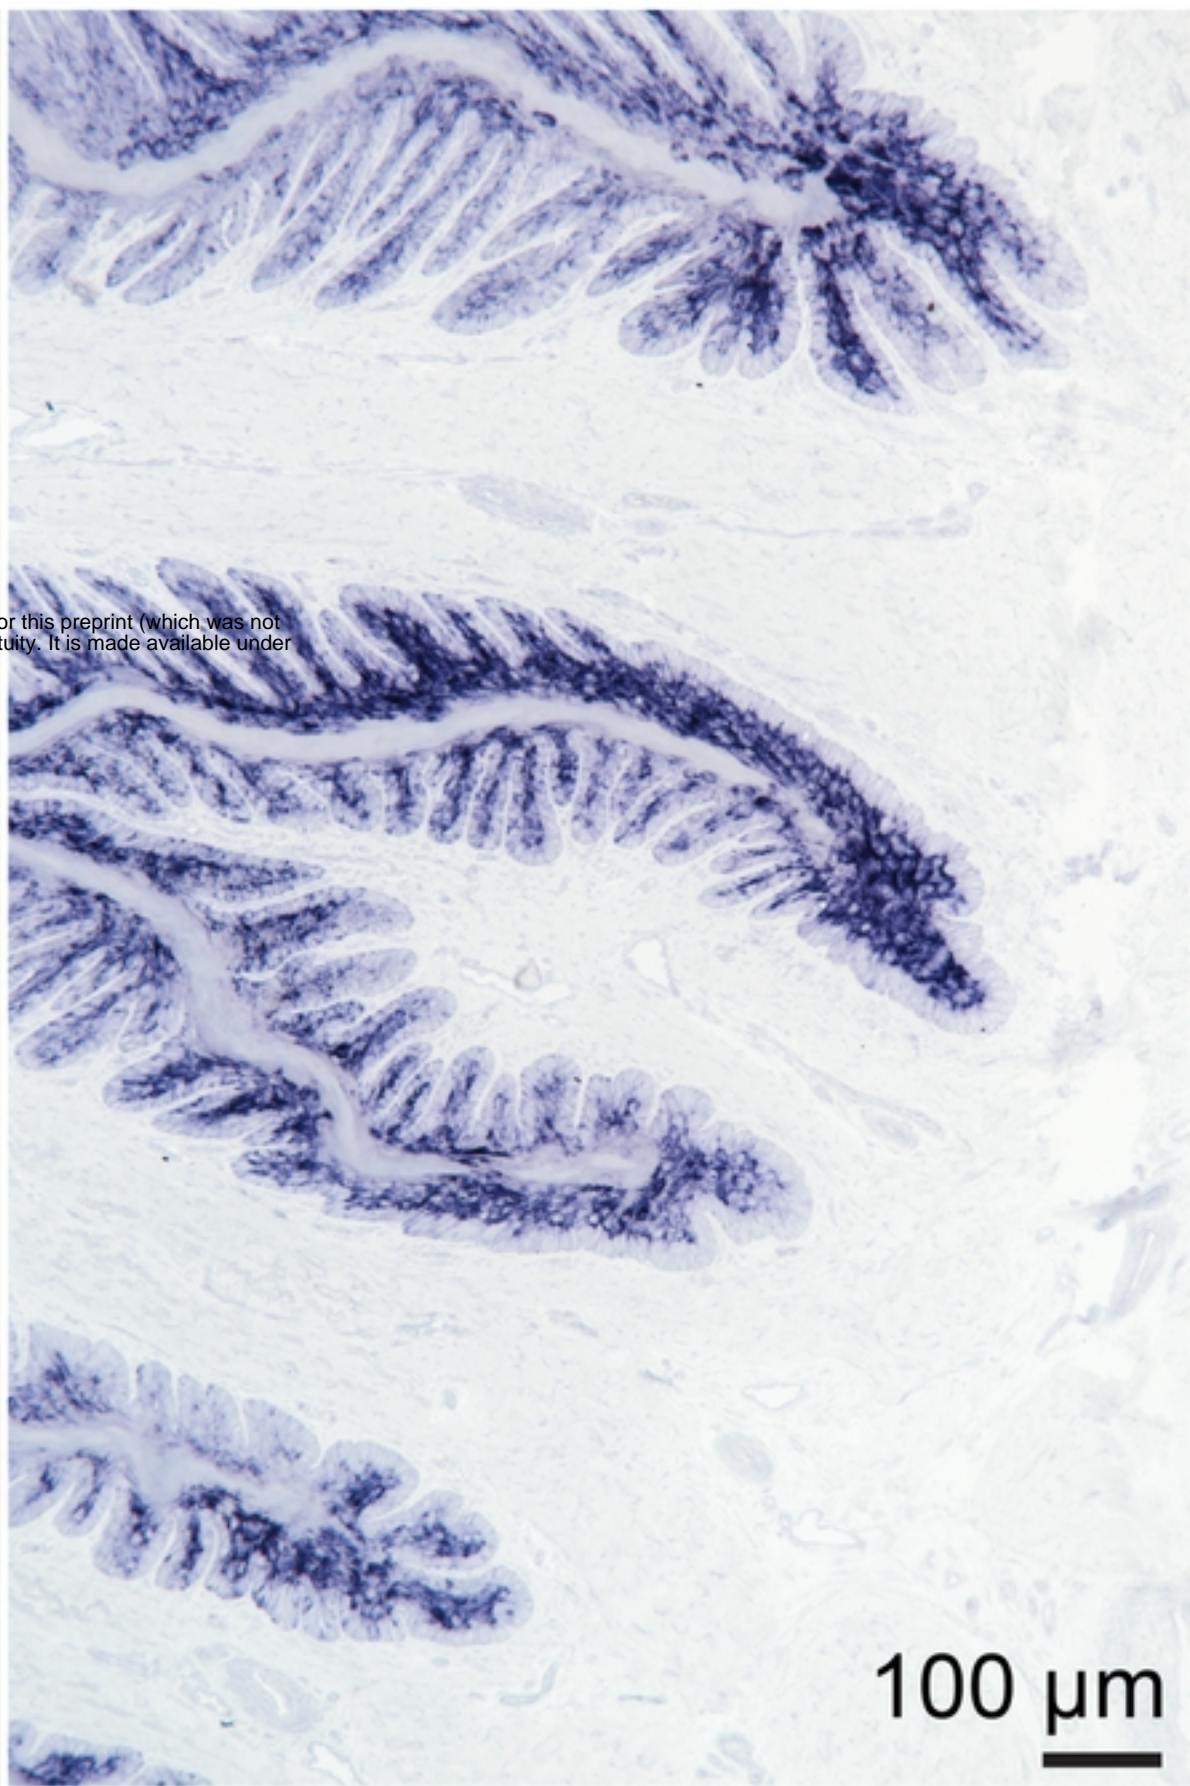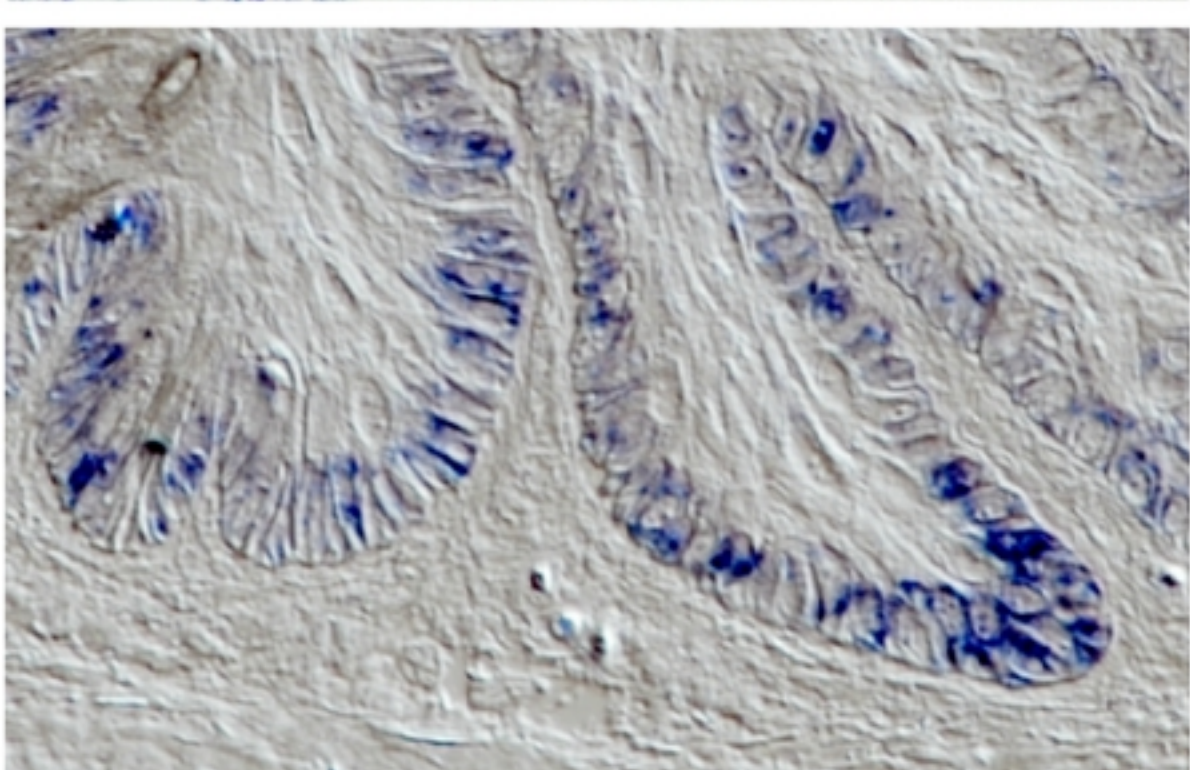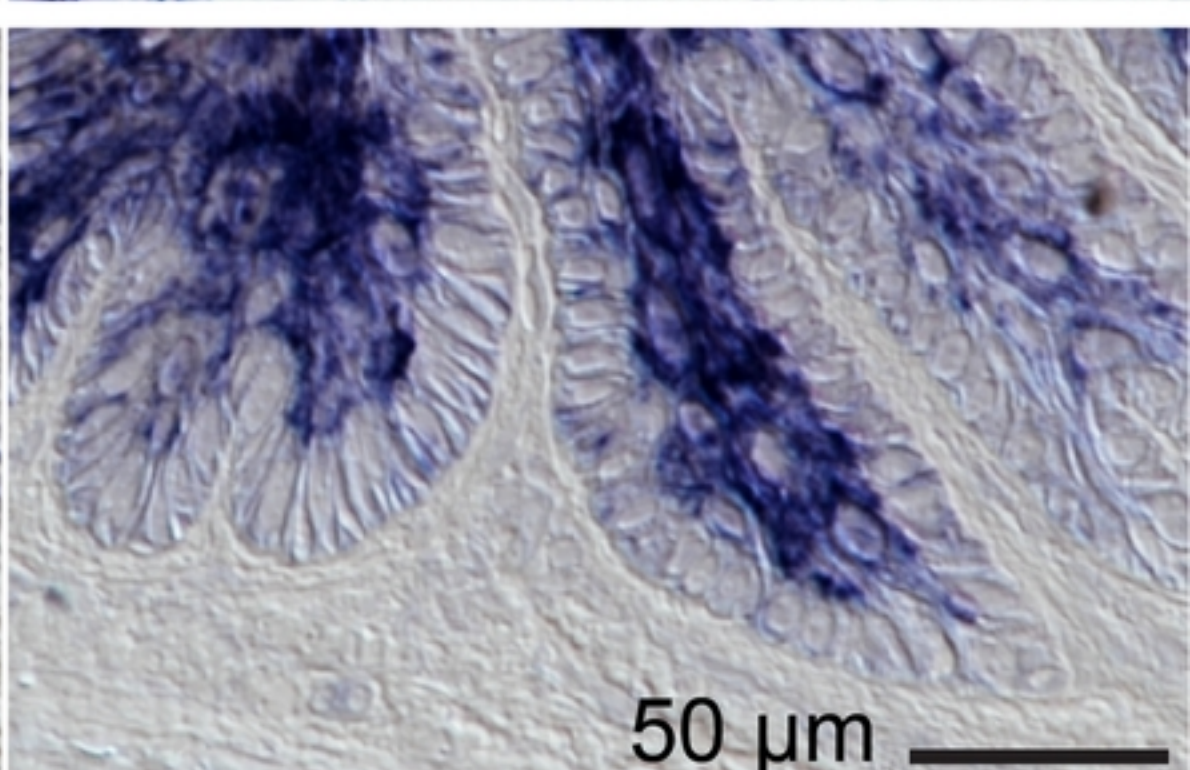

Figure 4



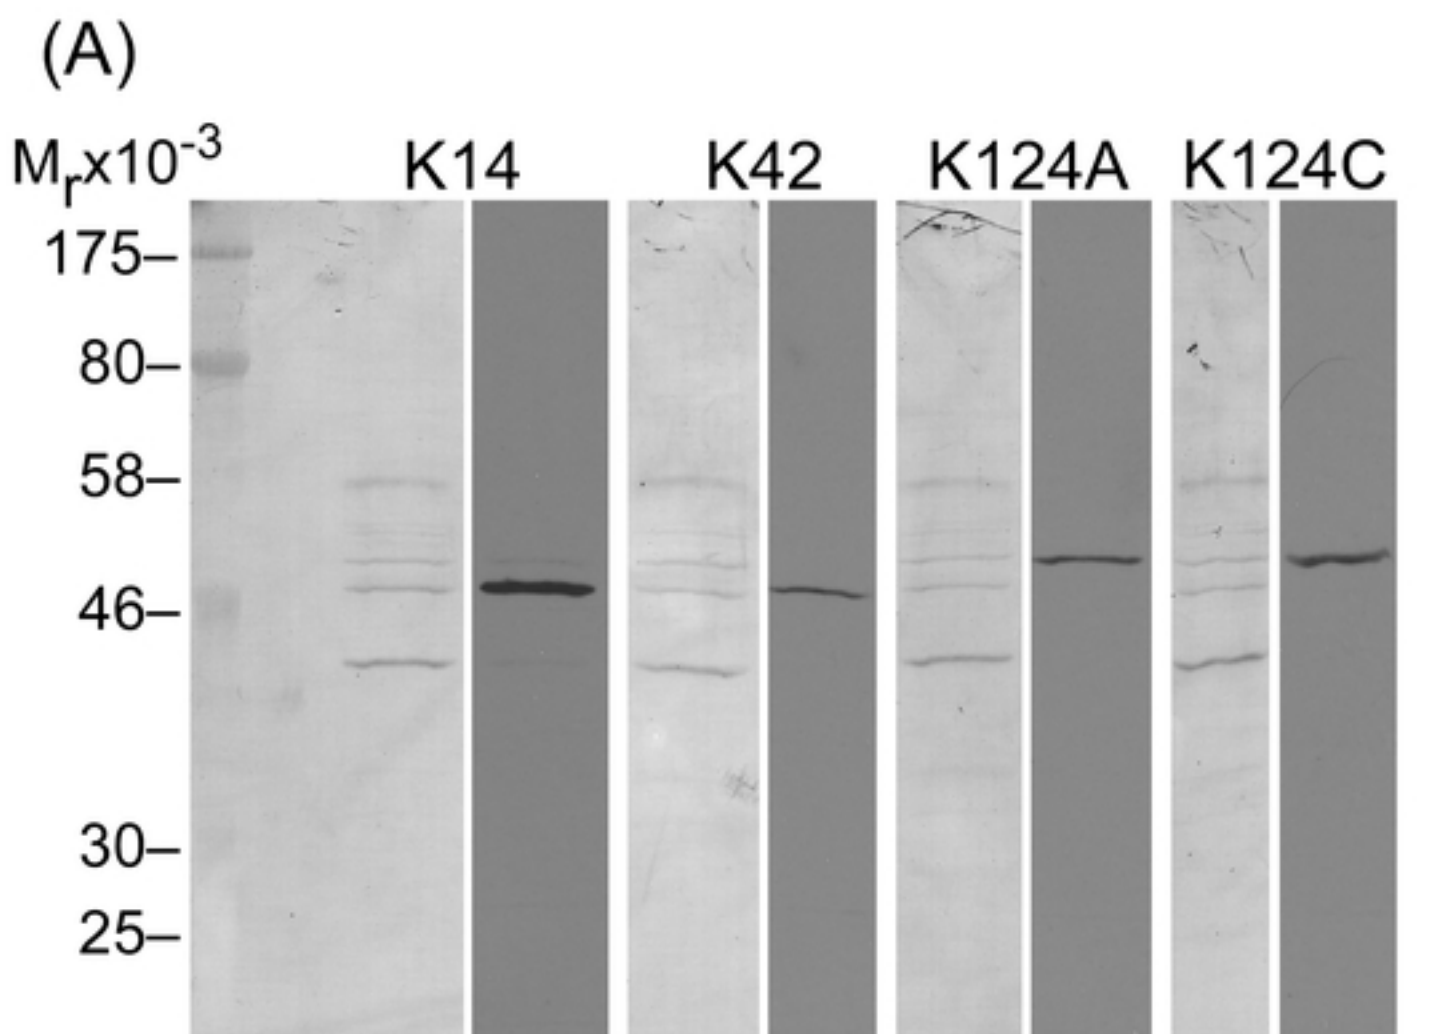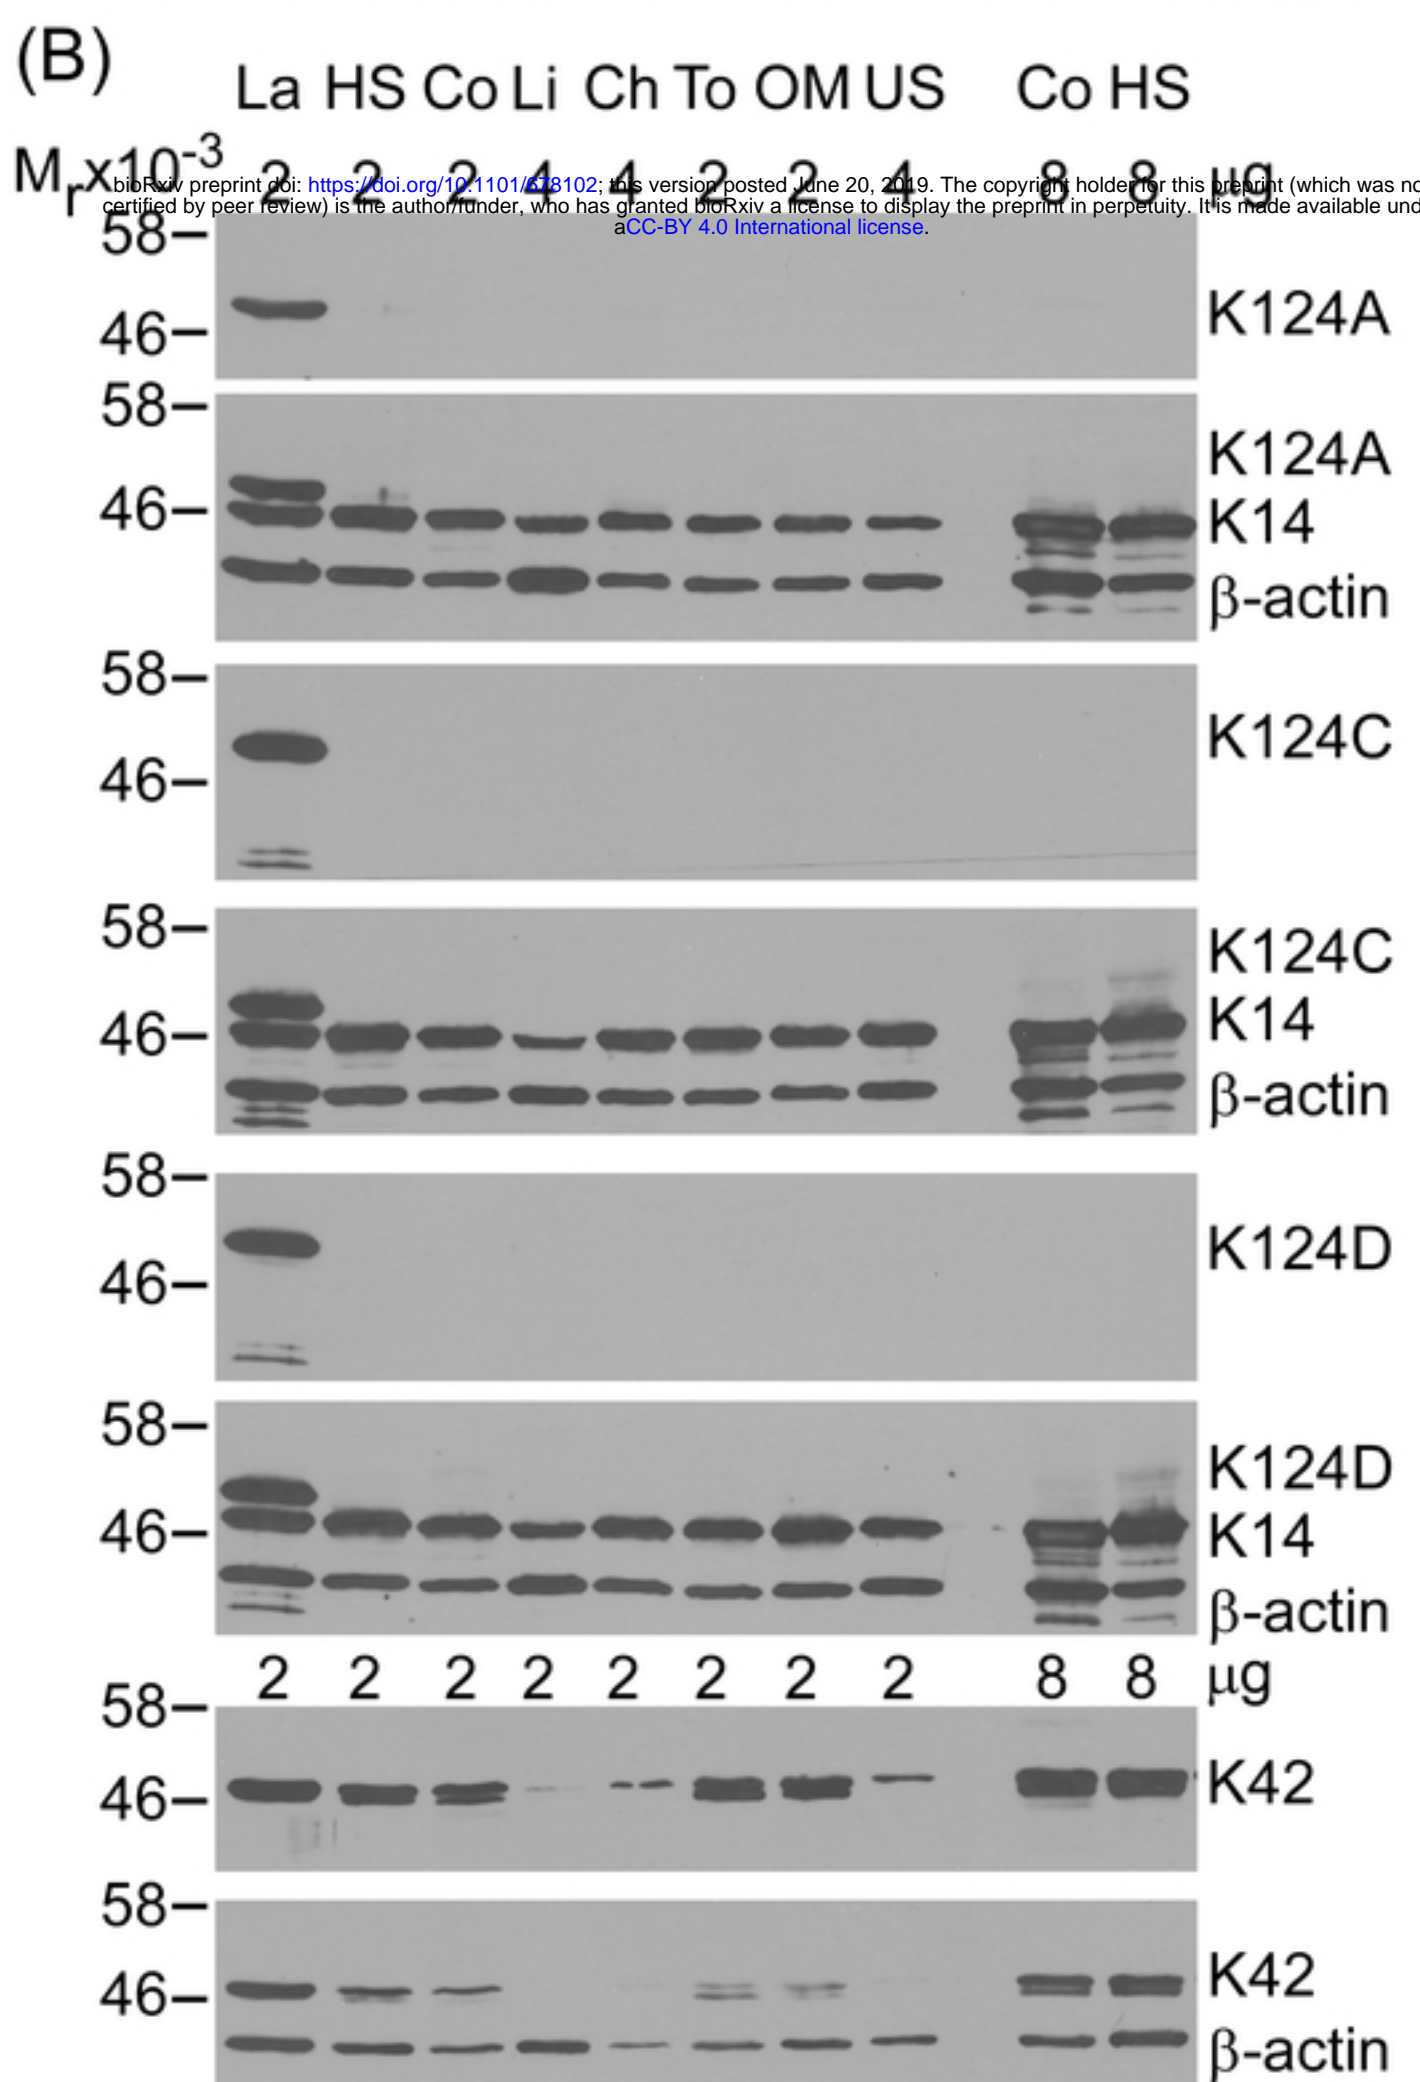

Figure 5



**K124****K124/WGA**

Lamellae

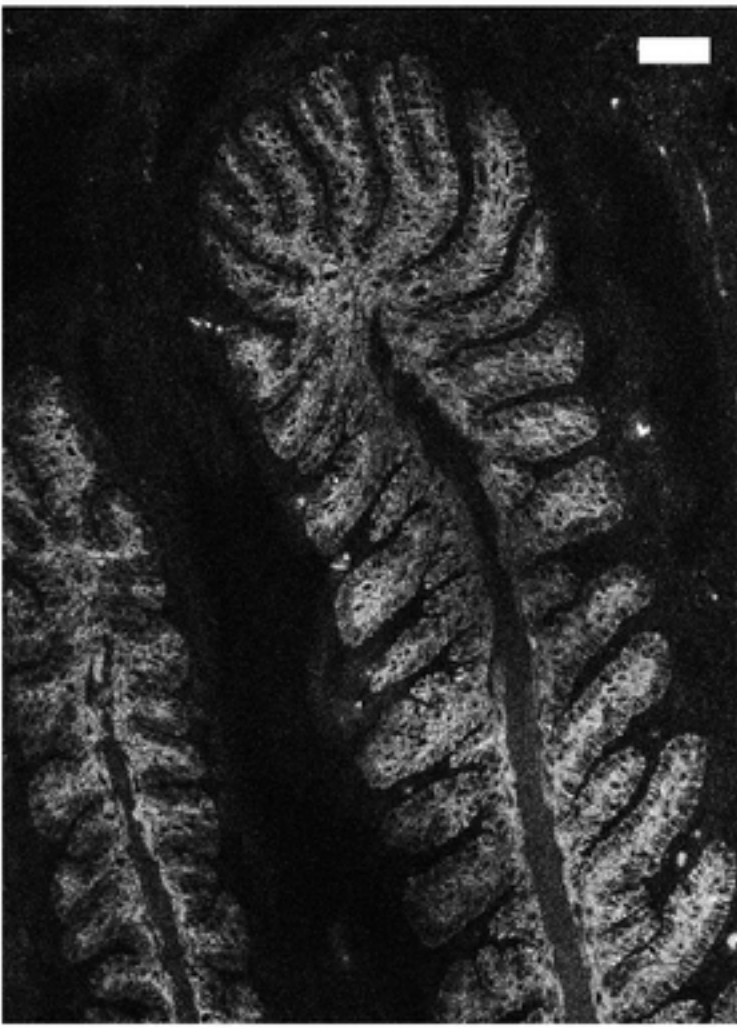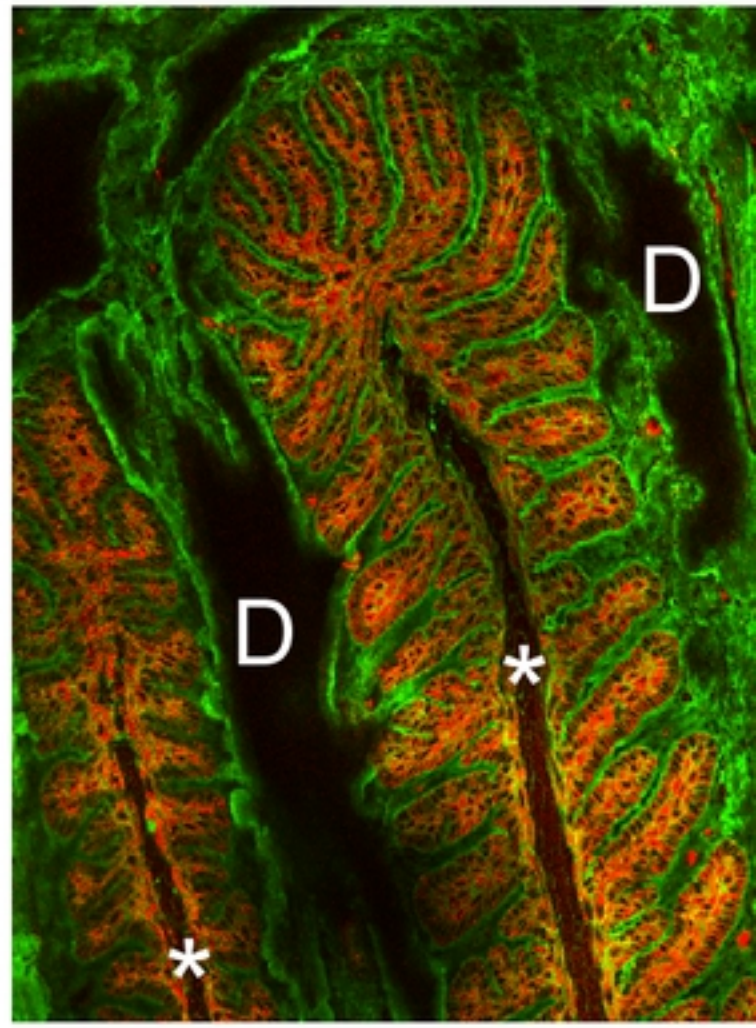

bioRxiv preprint doi: <https://doi.org/10.1101/678102>; this version posted June 20, 2019. The copyright holder for this preprint (which was not certified by peer review) is the author/funder, who has granted bioRxiv a license to display the preprint in perpetuity. It is made available under aCC-BY 4.0 International license.

Coronet

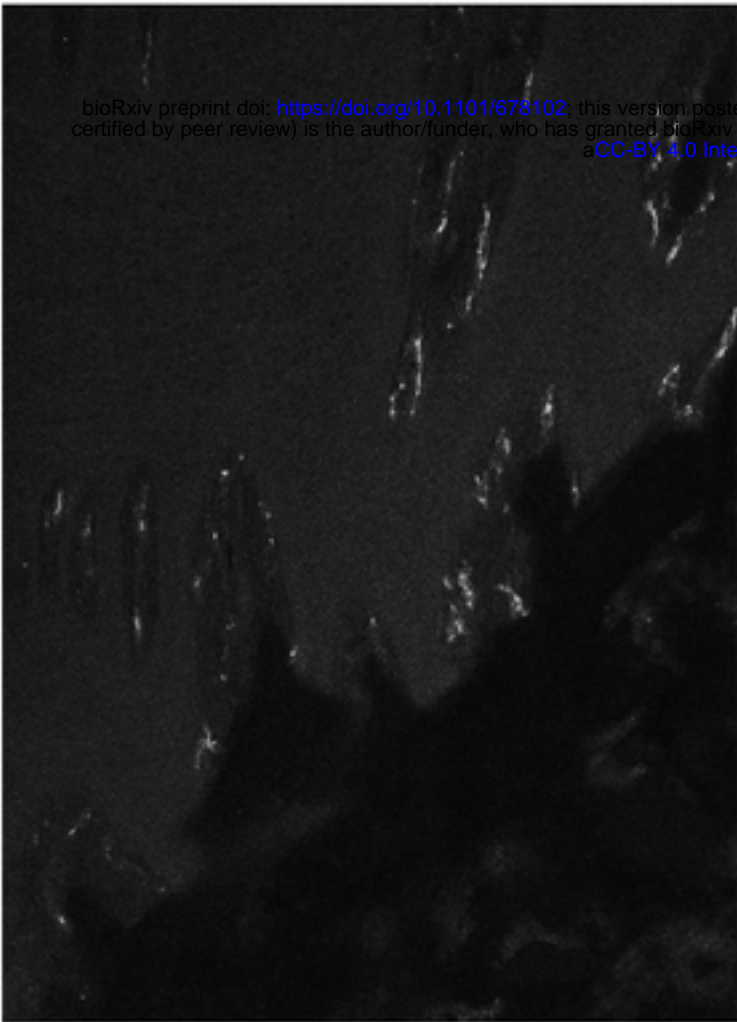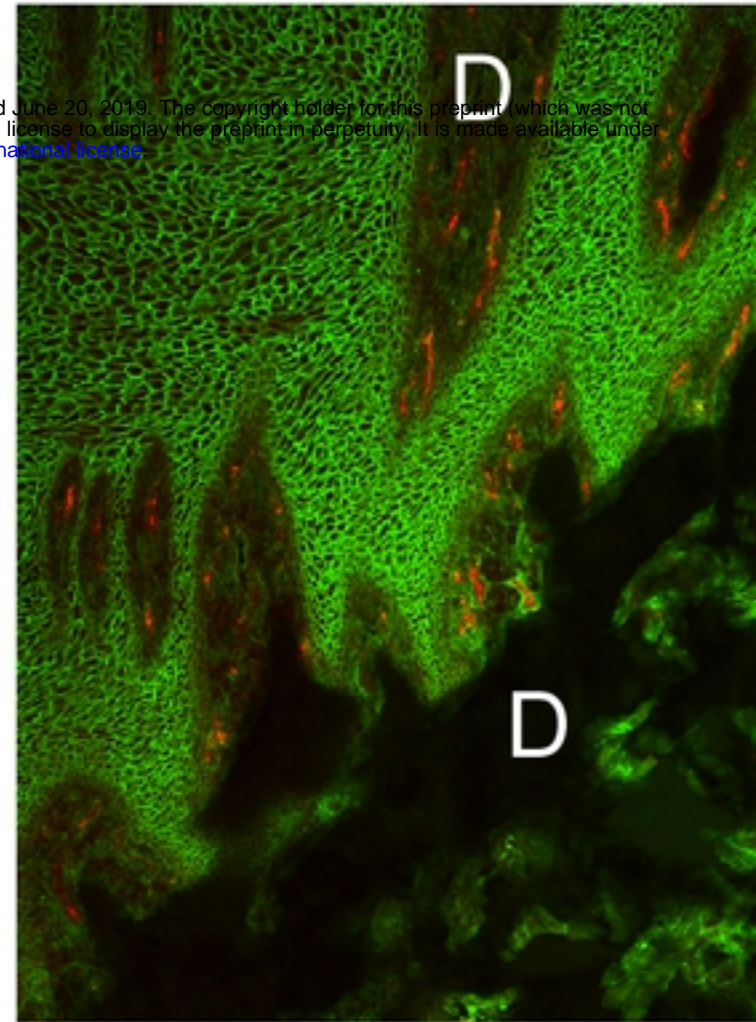

Haired skin

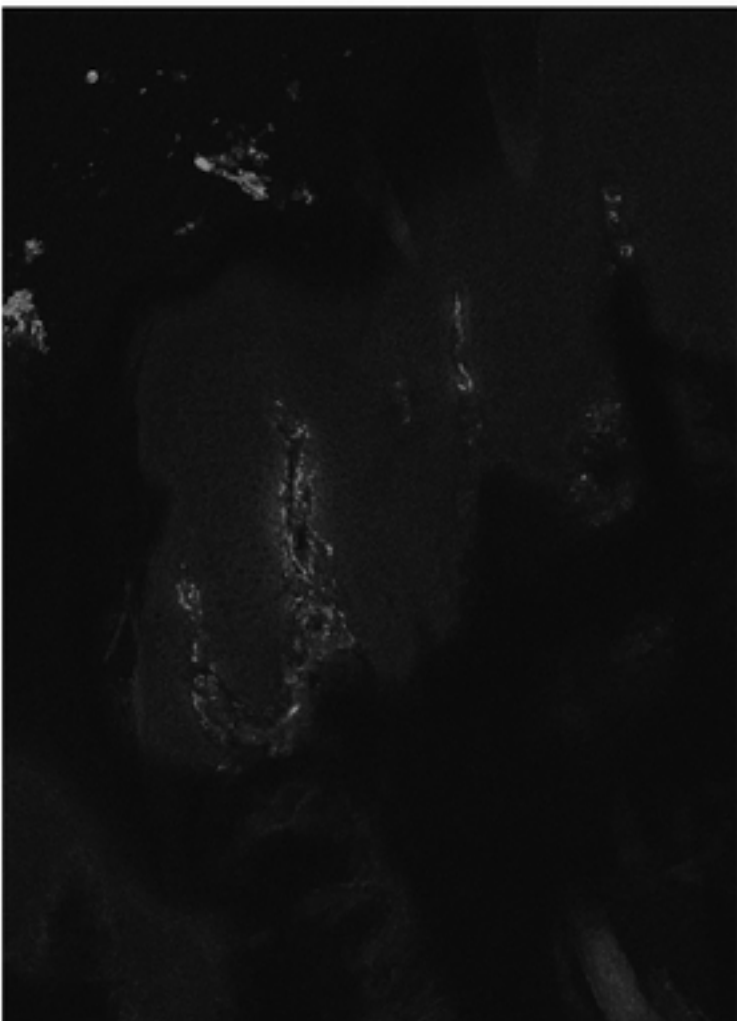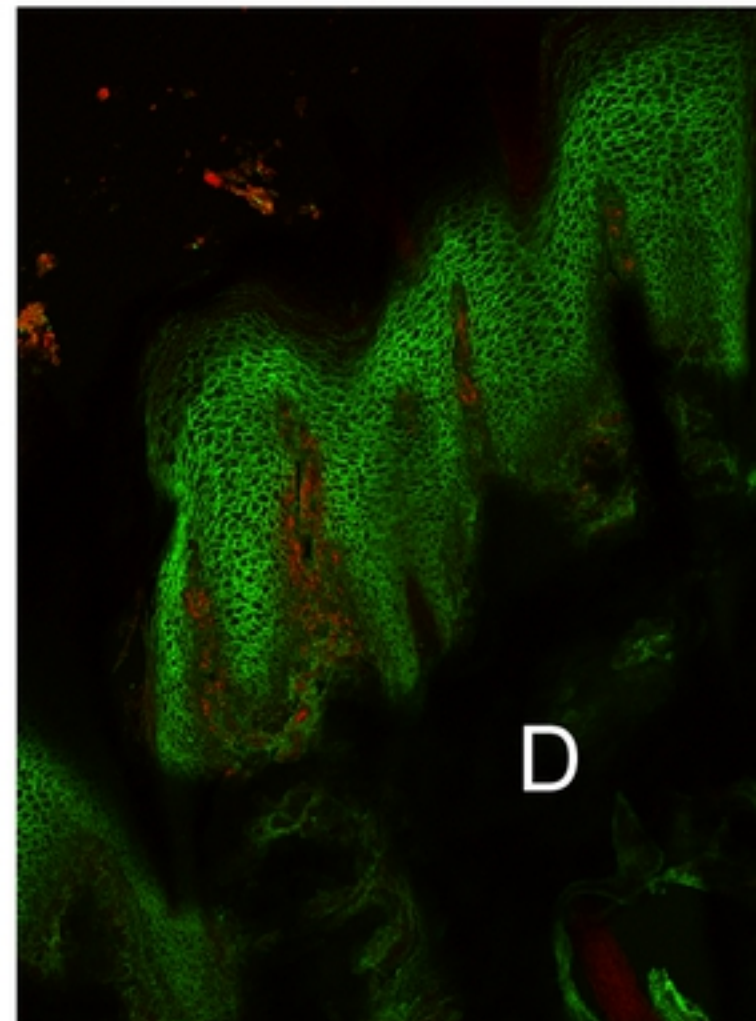

Figure 6
